# Supplementary material
Source: PubMed Central journal article supplement (PMC6800162)
Supplement: NIHMS970344-supplement.pdf [file NIHMS970344-supplement.pdf]

## **SUPPLEMENTAL MATERIAL:**

### **Effects of atopic dermatitis and gender on sebum lipid mediator and fatty acid profiles**

Karan Agrawal <sup>a,b</sup>, Lauren A. Hassoun <sup>c</sup>, Negar Foolad <sup>c</sup>, Kamil Borkowski <sup>b</sup>, Theresa L. Pedersen <sup>d</sup>, Raja K. Sivamani <sup>c,e,\*</sup>, John W. Newman <sup>a,b,f,\*</sup>

<sup>a</sup> Department of Nutrition, University of California-Davis, Davis, CA 95616, USA

<sup>b</sup> West Coast Metabolomics Center, University of California-Davis Genome Center, Davis, CA 95616, USA

<sup>c</sup> Department of Dermatology, University of California-Davis Medical Center, Sacramento, CA 95816, USA

<sup>d</sup> Advanced Analytics, Woodland, CA 95695, USA

<sup>e</sup> Department of Biological Sciences, California State University-Sacramento, Sacramento, CA 95819, USA

<sup>f</sup> Obesity and Metabolism Research Unit, Western Human Nutrition Research Center, Agricultural Research Service, United States Department of Agriculture, Davis, CA 95616, USA

*\* Corresponding authors:*

J.W.N.: USDA-ARS-Western Human Nutrition Research Center, 430 W Health Sciences Drive, Davis, CA 95616, USA. Email: john.newman@ars.usda.gov

R.K.S.: 3301 C Street, Suite 1400, Sacramento, CA 95816, USA. Email: raja.sivamani.md@gmail.com

## Supplemental Figure S1

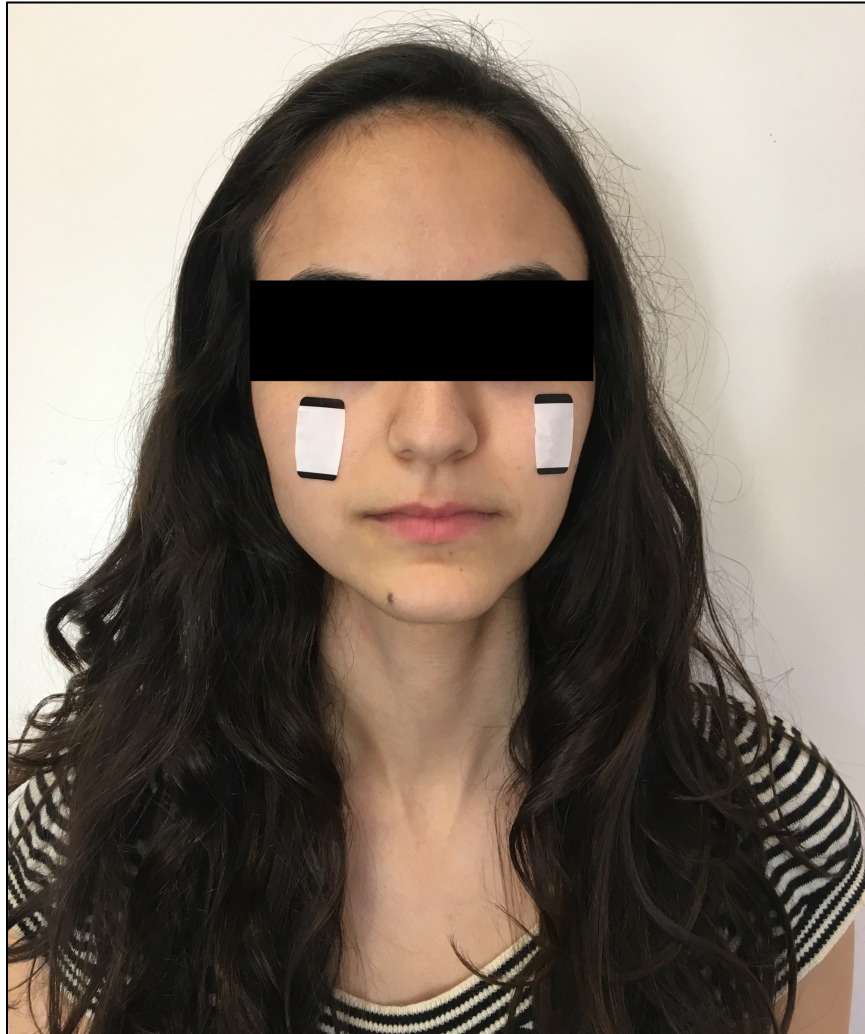

**Supplemental Fig. S1. Sebutape® patches were used to collect sebum for analysis in this study.** Patches consist of a lipid-absorbing polymeric film with adhesive that was placed on the bilateral cheeks for one hour and then placed on manufacturer-supplied plastic cards and stored at  $-80\text{ }^{\circ}\text{C}$  until analysis. As sebum is absorbed onto the Sebutape® patch, the patch changes from opaque to translucent, which provides a semi-quantitative estimation of the amount of sebum collected.

## Supplemental Figure S2

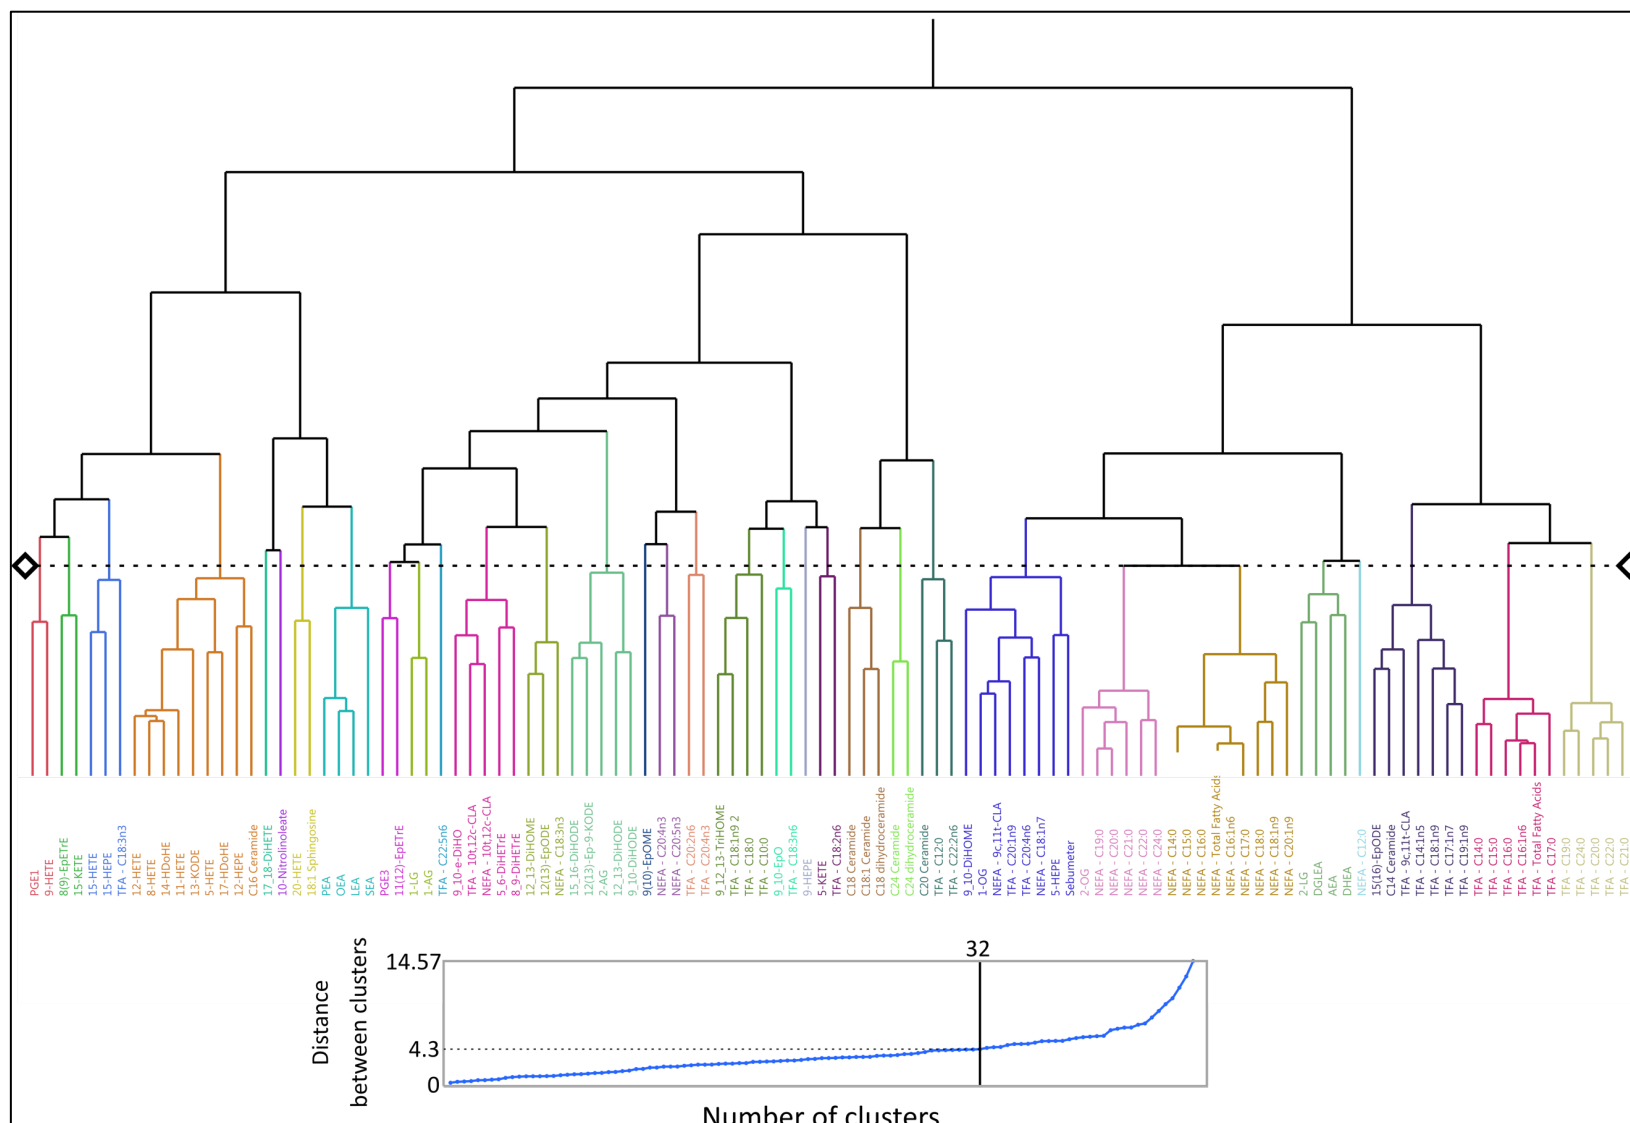

**Supplemental Fig. S2. Hierarchical clustering of variables based on Ward's method.** Upper panel: Hierarchical clustering tree. Lower panel: Distance between clusters calculated based on ANOVA sum of squares  $v/s$  the number of clusters.

## Supplemental Figure S3

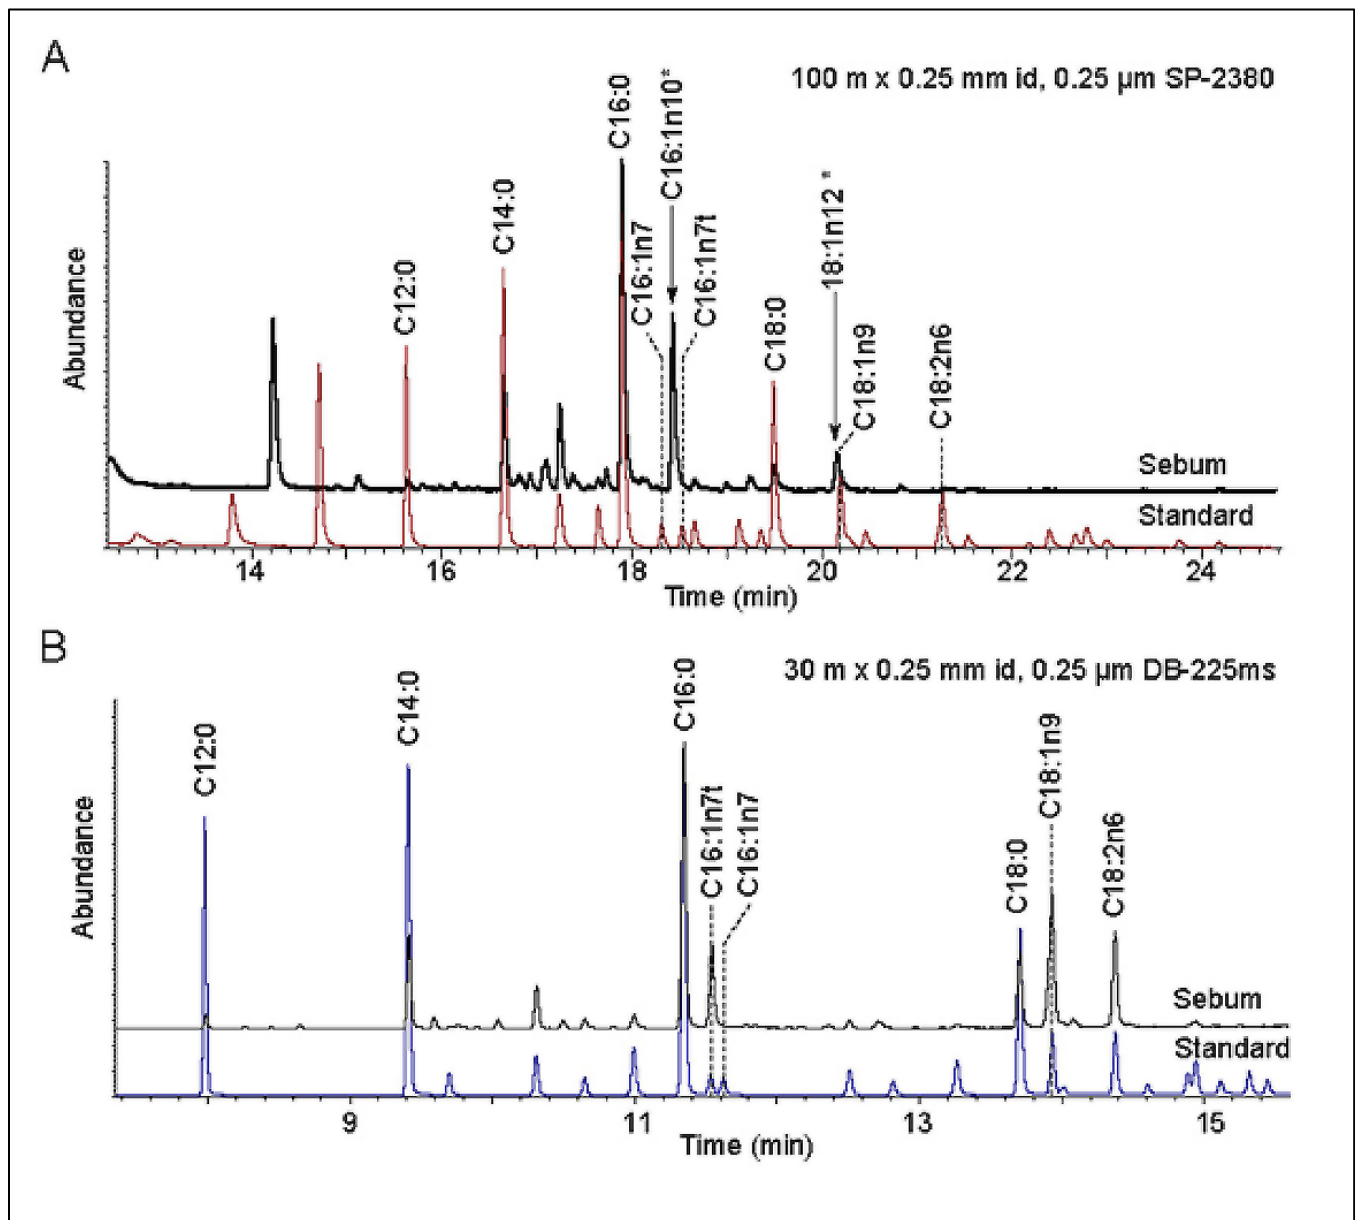

**Supplemental Fig. S3. Sebum lipids separated on two distinct gas chromatography columns demonstrates unique isomeric composition of sebum.** A: Lipids separated on a 90% biscyanopropyl/10% cyanopropylphenyl polysiloxane column designed for cis/trans isomer resolution. B: Lipids separated on a (50%-cyanopropylphenyl)-methylpolysiloxane used for quantification. Where different, calibration standards lipids are indicated with dashed lines and sebum lipids are indicated with arrows.

## Supplemental Table S1

**Supplemental Table S1A.** Mobile phase gradient conditions for the analysis of oxylipins, nitrolipids, free fatty acids, endocannabinoids and endocannabinoid-like compounds by UPLC-MS/MS. A Waters Acquity UPLC<sup>®</sup> BEH C18 2.1 x 150 mm, 1.7  $\mu$ m column was used to separate analytes and column temperature was maintained at 60°C.

| Time (min) | Mobile Phase A <sup>a</sup> (%) | Mobile Phase B <sup>b</sup> (%) | Flow Rate (mL/min) |
|------------|---------------------------------|---------------------------------|--------------------|
| 0.00       | 75                              | 25                              | 0.25               |
| 1.00       | 60                              | 40                              | 0.25               |
| 2.50       | 58                              | 42                              | 0.25               |
| 4.50       | 50                              | 50                              | 0.25               |
| 10.50      | 35                              | 65                              | 0.25               |
| 12.50      | 25                              | 75                              | 0.25               |
| 13.25      | 20                              | 80                              | 0.25               |
| 17.25      | 15                              | 85                              | 0.25               |
| 18.25      | 5                               | 95                              | 0.25               |
| 18.75      | 0                               | 100                             | 0.25               |
| 19.00      | 0                               | 100                             | 0.25               |
| 19.10      | 75                              | 25                              | 0.25               |
| 20.00      | 75                              | 25                              | 0.25               |

<sup>a</sup> Mobile Phase A: 0.1% Acetic Acid in Water

<sup>b</sup> Mobile Phase B: 90:10 Acetonitrile:Isopropanol

Supplemental Table S1

Supplemental Table S1B. UPLC/electrospray ionization QTrap analyte and instrument specific parameters for assayed oxylipins, nitrolipids, free fatty acids, endocannabinoids, and endocannabinoid-like compounds

| Lipid Mediator  | Analyte Class | Fatty Acid Precursor | Internal Standard | Retention Time (min) | Electrospray Ionization Mode | Q1 > Q3 Transition (m/z) | Collision Energy (V) | Declustering Potential (V) |
|-----------------|---------------|----------------------|-------------------|----------------------|------------------------------|--------------------------|----------------------|----------------------------|
| PHAU -esi       | ISTD          |                      |                   | 3.07                 | Negative                     | 249.2 > 130.1            | -18                  | -30                        |
| 6-keto PGF1a    | Prostanoid    | C20:4n6              | d4-PGF2a          | 3.43                 | Negative                     | 369.3 > 163.1            | -33                  | -70                        |
| d4-6-Keto PGF1a | SSTD          |                      | PHAU -esi         | 3.45                 | Negative                     | 373.3 > 167.1            | -36                  | -70                        |
| PGF3a           | Prostanoid    | C20:5n3              | d4-PGF2a          | 4.03                 | Negative                     | 351.3 > 307.4            | -24                  | -60                        |
| PGE3            | Prostanoid    | C20:5n3              | d4-PGF2a          | 4.18                 | Negative                     | 349.3 > 269.2            | -21                  | -35                        |
| TXB2            | Prostanoid    | C20:4n6              | d4-TXB2           | 4.48                 | Negative                     | 369.3 > 169.1            | -21                  | -50                        |
| d4-TXB2         | SSTD          |                      | PHAU -esi         | 4.55                 | Negative                     | 373.3 > 173.1            | -45                  | -50                        |
| Sum TriHOMEs    | Triol         | C18:2n6              | d4-PGF2a          | 4.73                 | Negative                     | 329.2 > 211.2            | -30                  | -60                        |
| d4-PGF2a        | SSTD          |                      | PHAU -esi         | 4.77                 | Negative                     | 357.3 > 197.2            | -33                  | -70                        |
| PGF2a           | Prostanoid    | C20:4n6              | d4-PGF2a          | 4.78                 | Negative                     | 353.3 > 193.2            | -33                  | -70                        |
| PGE2            | Prostanoid    | C20:4n6              | d4-PGD2           | 4.89                 | Negative                     | 351.302 > 271.2          | -21                  | -40                        |
| PGE1            | Prostanoid    | C20:3n6              | d4-PGD2           | 5.06                 | Negative                     | 353.3 > 317.2            | -18                  | -40                        |
| d4-PGD2         | SSTD          |                      | PHAU -esi         | 5.17                 | Negative                     | 355.3 > 275.2            | -27                  | -40                        |
| PGD2            | Prostanoid    | C20:4n6              | d4-PGD2           | 5.18                 | Negative                     | 351.303 > 271.2          | -24                  | -40                        |
| 15-Keto PGE2    | Prostanoid    | C20:4n6              | d4-PGF2a          | 5.22                 | Negative                     | 349.2 > 331.3            | -15                  | -50                        |
| Resolvin D1     | Triol         | C20:4n6              | d4-PGF2a          | 5.69                 | Negative                     | 375.3 > 121.1            | -39                  | -60                        |
| Lipoxin A4      | Triol         | C20:4n6              | d4-PGF2a          | 5.80                 | Negative                     | 351.3 > 217.2            | -27                  | -45                        |
| LTB5            | Leukotriene   | C20:5n3              | d4-PGF2a          | 6.89                 | Negative                     | 333.3 > 195.2            | -21                  | -50                        |
| 15,16-DiHODE    | Diol          | C18:3n3              | d11-14,15-DiHETrE | 7.38                 | Negative                     | 311.2 > 235.2            | -27                  | -55                        |
| 12,13-DiHODE    | Diol          | C18:3n3              | d11-14,15-DiHETrE | 7.47                 | Negative                     | 311.2 > 183.2            | -27                  | -60                        |
| 8,15-DiHETE     | Diol          | C20:5n3              | d11-14,15-DiHETrE | 7.48                 | Negative                     | 335.3 > 235.2            | -21                  | -65                        |
| 9,10-DiHODE     | Diol          | C18:3n3              | d11-14,15-DiHETrE | 7.52                 | Negative                     | 311.2 > 201.2            | -27                  | -65                        |
| d4-LTB4         | SSTD          |                      | CUDA -esi         | 7.62                 | Negative                     | 339.3 > 163.1            | -33                  | -70                        |
| 17,18-DiHETE    | Diol          | C20:5n3              | d11-14,15-DiHETrE | 7.75                 | Negative                     | 335.3 > 247.2            | -24                  | -70                        |

ISTD - Internal Standard. This compound is added to the samples at the reconstitution step

SSTD - Surrogate. This compound is added to the samples prior to extraction

Supplemental Table S1

Supplemental Table S1B. UPLC/electrospray ionization QTrap analyte and instrument specific parameters for assayed oxylipins, nitrolipids, free fatty acids, endocannabinoids, and endocannabinoid-like compounds

| Lipid Mediator    | Analyte Class | Fatty Acid Precursor | Internal Standard | Retention Time (min) | Electrospray Ionization Mode | Q1 > Q3 Transition (m/z) | Collision Energy (V) | Declustering Potential (V) |
|-------------------|---------------|----------------------|-------------------|----------------------|------------------------------|--------------------------|----------------------|----------------------------|
| 5,15-DiHETE       | Diol          | C20:5n3              | d11-14,15-DiHETrE | 7.75                 | Negative                     | 335.3 > 173.1            | -18                  | -40                        |
| 6-trans-LTB4      | Leukotriene   | C20:4n6              | d11-14,15-DiHETrE | 7.79                 | Negative                     | 335.301 > 195.2          | -21                  | -85                        |
| 14,15-DiHETE      | Diol          | C20:5n3              | d11-14,15-DiHETrE | 8.42                 | Negative                     | 335.3 > 207.2            | -24                  | -40                        |
| CUDA -esi         | ISTD          |                      |                   | 8.45                 | Negative                     | 339.4 > 214.2            | -30                  | -70                        |
| LTB4              | Leukotriene   | C20:4n6              | d11-14,15-DiHETrE | 8.50                 | Negative                     | 335.302 > 195.2          | -24                  | -50                        |
| 10,11-DHHep       | SSTD          |                      | CUDA -esi         | 8.80                 | Negative                     | 301.2 > 283.2            | -30                  | -90                        |
| 12,13-DiHOME      | Diol          | C18:2n6              | d11-14,15-DiHETrE | 8.81                 | Negative                     | 313.3 > 183.2            | -30                  | -70                        |
| 9,10-DiHOME       | Diol          | C18:2n6              | d11-14,15-DiHETrE | 9.23                 | Negative                     | 313.3 > 201.2            | -27                  | -65                        |
| d11-14,15-DiHETrE | SSTD          |                      | CUDA -esi         | 9.42                 | Negative                     | 348.4 > 207.2            | -24                  | -65                        |
| 19,20-DiHDoPE     | Diol          | C22:6n3              | d11-14,15-DiHETrE | 9.46                 | Negative                     | 361.3 > 273.2            | -24                  | -80                        |
| 14,15-DiHETrE     | Diol          | C20:4n6              | d11-14,15-DiHETrE | 9.49                 | Negative                     | 337.3 > 207.2            | -24                  | -60                        |
| 11,12-DiHETrE     | Diol          | C20:4n6              | d11-14,15-DiHETrE | 10.10                | Negative                     | 337.3 > 167.1            | -27                  | -55                        |
| 9,10-e-DiHO       | Diol          | C18:0                | d11-14,15-DiHETrE | 10.23                | Negative                     | 315.2 > 297.2            | -30                  | -110                       |
| 12,13-Ep-9-KODE   | Ketone        | C18:3n3              | d11-14,15-DiHETrE | 10.39                | Negative                     | 309.2 > 291.2            | -21                  | -90                        |
| 9-HOTrE           | Alcohol       | C18:3n3              | d4-9(S)-HODE      | 10.42                | Negative                     | 293.2 > 171.1            | -21                  | -60                        |
| 13-HOTrE          | Alcohol       | C18:3n3              | d4-9(S)-HODE      | 10.50                | Negative                     | 293.2 > 195.2            | -24                  | -70                        |
| 8,9-DiHETrE       | Diol          | C20:4n6              | d11-14,15-DiHETrE | 10.59                | Negative                     | 337.3 > 127.1            | -27                  | -65                        |
| 15-deoxy PGJ2     | Prostanoid    | C20:4n6              | d11-14,15-DiHETrE | 10.66                | Negative                     | 315.2 > 271.2            | -21                  | -50                        |
| d6-20-HETE        | SSTD          |                      | CUDA -esi         | 10.81                | Negative                     | 325.3 > 281.2            | -21                  | -80                        |
| 20-HETE           | Alcohol       | C20:4n6              | d6-20-HETE        | 10.85                | Negative                     | 319.2 > 275.2            | -24                  | -95                        |
| 15-HEPE           | Alcohol       | C20:5n3              | d8-12(S)-HETE     | 10.95                | Negative                     | 317.2 > 219.2            | -18                  | -55                        |
| 12-HEPE           | Alcohol       | C20:5n3              | d8-12(S)-HETE     | 11.22                | Negative                     | 317.2 > 179.1            | -18                  | -45                        |
| 5,6-DiHETrE       | Diol          | C20:4n6              | d11-14,15-DiHETrE | 11.37                | Negative                     | 337.3 > 145.1            | -24                  | -55                        |
| 9-HEPE            | Alcohol       | C20:5n3              | d4-9(S)-HODE      | 11.43                | Negative                     | 317.201 > 167.2          | -18                  | -45                        |

ISTD - Internal Standard. This compound is added to the samples at the reconstitution step

SSTD - Surrogate. This compound is added to the samples prior to extraction

Supplemental Table S1

Supplemental Table S1B. UPLC/electrospray ionization QTrap analyte and instrument specific parameters for assayed oxylipins, nitrolipids, free fatty acids, endocannabinoids, and endocannabinoid-like compounds

| Lipid Mediator  | Analyte Class | Fatty Acid Precursor | Internal Standard | Retention Time (min) | Electrospray Ionization Mode | Q1 > Q3 Transition (m/z) | Collision Energy (V) | Declustering Potential (V) |
|-----------------|---------------|----------------------|-------------------|----------------------|------------------------------|--------------------------|----------------------|----------------------------|
| 13-HODE         | Alcohol       | C18:2n6              | d4-9(S)-HODE      | 11.72                | Negative                     | 295.201 > 195.2          | -24                  | -90                        |
| 5-HEPE          | Alcohol       | C20:5n3              | d8-5(S)-HETE      | 11.91                | Negative                     | 317.2 > 115.1            | -21                  | -40                        |
| 9-HODE          | Alcohol       | C18:2n6              | d4-9(S)-HODE      | 11.91                | Negative                     | 295.201 > 171.1          | -24                  | -70                        |
| d4-9,S-HODE     | SSTD          |                      | CUDA -esi         | 11.94                | Negative                     | 299.2 > 172.1            | -27                  | -85                        |
| 15,16-EpODE     | Epoxide       | C18:3n3              | d4-12,13-EpOME    | 12.00                | Negative                     | 293.201 > 275.2          | -18                  | -75                        |
| 15-HETE         | Alcohol       | C20:4n6              | d8-12(S)-HETE     | 12.10                | Negative                     | 319.201 > 219.2          | -18                  | -55                        |
| 13-KODE         | Ketone        | C18:2n6              | d4-9(S)-HODE      | 12.18                | Negative                     | 293.2 > 179.1            | -27                  | -80                        |
| 9,10-EpODE      | Epoxide       | C18:3n3              | d4-12,13-EpOME    | 12.19                | Negative                     | 293.202 > 275.2          | -18                  | -65                        |
| 17,18-EpETE     | Epoxide       | C20:5n3              | d4-12,13-EpOME    | 12.21                | Negative                     | 317.2 > 259.2            | -15                  | -55                        |
| 17-HDoHE        | Alcohol       | C22:6n3              | d8-12(S)-HETE     | 12.31                | Negative                     | 343.301 > 281.2          | -18                  | -55                        |
| 12,13-EpODE     | Epoxide       | C18:3n3              | d4-12,13-EpOME    | 12.40                | Negative                     | 293.2 > 183.2            | -24                  | -50                        |
| 14-HDoHE        | Alcohol       | C22:6n3              | d8-12(S)-HETE     | 12.52                | Negative                     | 343.302 > 281.2          | -18                  | -60                        |
| 15-HpETE screen | Hydroperoxide | C20:4n6              | d8-12(S)-HETE     | 12.55                | Negative                     | 335.2 > 113.1            | -24                  | -55                        |
| 11-HETE         | Alcohol       | C20:4n6              | d8-12(S)-HETE     | 12.55                | Negative                     | 319.201 > 167.1          | -21                  | -45                        |
| 14,15-EpETE     | Epoxide       | C20:5n3              | d4-12,13-EpOME    | 12.57                | Negative                     | 317.2 > 247.2            | -18                  | -35                        |
| 15-KETE         | Ketone        | C20:4n6              | d8-12(S)-HETE     | 12.58                | Negative                     | 317.2 > 273.2            | -18                  | -60                        |
| 13-HpODE screen | Hydroperoxide | C18:2n6              | d4-9(S)-HODE      | 12.62                | Negative                     | 311.2 > 179.1            | -24                  | -55                        |
| 9-KODE          | Ketone        | C18:2n6              | d4-9(S)-HODE      | 12.62                | Negative                     | 293.2 > 185.2            | -27                  | -100                       |
| d8-12(S)-HETE   | SSTD          |                      | CUDA -esi         | 12.67                | Negative                     | 327.2 > 184.2            | -21                  | -60                        |
| 11,12-EpETE     | Epoxide       | C20:5n3              | d4-12,13-EpOME    | 12.70                | Negative                     | 317.202 > 167.2          | -18                  | -40                        |
| 9-HpODE screen  | Hydroperoxide | C18:2n6              | d4-9(S)-HODE      | 12.72                | Negative                     | 311.2 > 185.2            | -24                  | -55                        |
| 12-HETE         | Alcohol       | C20:4n6              | d8-12(S)-HETE     | 12.87                | Negative                     | 319.2 > 179.1            | -21                  | -60                        |
| 12-HpETE screen | Hydroperoxide | C20:4n6              | d8-12(S)-HETE     | 12.95                | Negative                     | 335.2 > 153.1            | -27                  | -55                        |
| 8-HETE          | Alcohol       | C20:4n6              | d8-12(S)-HETE     | 12.96                | Negative                     | 319.201 > 155.1          | -21                  | -45                        |

ISTD - Internal Standard. This compound is added to the samples at the reconstitution step

SSTD - Surrogate. This compound is added to the samples prior to extraction



Supplemental Table S1

Supplemental Table S1B. UPLC/electrospray ionization QTrap analyte and instrument specific parameters for assayed oxylipins, nitrolipids, free fatty acids, endocannabinoids, and endocannabinoid-like compounds

| Lipid Mediator      | Analyte Class     | Fatty Acid Precursor | Internal Standard   | Retention Time (min) | Electrospray Ionization Mode | Q1 > Q3 Transition (m/z) | Collision Energy (V) | Declustering Potential (V) |
|---------------------|-------------------|----------------------|---------------------|----------------------|------------------------------|--------------------------|----------------------|----------------------------|
| 9-HETE              | Alcohol           | C20:4n6              | d8-12(S)-HETE       | 13.08                | Negative                     | 319.202 > 167.1          | -18                  | -60                        |
| d8-5(S)-HETE        | SSTD              |                      | CUDA -esi           | 13.29                | Negative                     | 327.2 > 116.1            | -18                  | -70                        |
| 5-HpETE screen      | Hydroperoxide     | C20:4n6              | d8-5(S)-HETE        | 13.44                | Negative                     | 335.2 > 155.1            | -24                  | -55                        |
| 19,20-EpDPE         | Epoxide           | C22:6n3              | d4-12,13-EpOME      | 13.47                | Negative                     | 343.303 > 281.2          | -18                  | -60                        |
| 5-HETE              | Alcohol           | C20:4n6              | d8-5(S)-HETE        | 13.48                | Negative                     | 319.2 > 115.1            | -18                  | -50                        |
| d4-12,13-EpOME      | SSTD <sup>c</sup> |                      | CUDA -esi           | 13.54                | Negative                     | 299.2 > 198.1            | -24                  | -90                        |
| 12,13-EpOME         | Epoxide           | C18:2n6              | d4-12,13-EpOME      | 13.63                | Negative                     | 295.202 > 195.2          | -21                  | -85                        |
| 4-HDoHE             | Alcohol           | C22:6n3              | d8-5(S)-HETE        | 13.65                | Negative                     | 343.304 > 281.2          | -18                  | -60                        |
| 14,15-EpETrE        | Epoxide           | C20:4n6              | d4-12,13-EpOME      | 13.67                | Negative                     | 319.202 > 219.2          | -18                  | -50                        |
| 9,10-EpOME          | Epoxide           | C18:2n6              | d4-12,13-EpOME      | 13.79                | Negative                     | 295.202 > 171.1          | -21                  | -75                        |
| 16,17-EpDPE         | Epoxide           | C22:6n3              | d4-12,13-EpOME      | 13.83                | Negative                     | 343.3 > 273.5            | -15                  | -45                        |
| 5-KETE              | Ketone            | C20:4n6              | d8-5(S)-HETE        | 14.09                | Negative                     | 317.2 > 203.2            | -27                  | -75                        |
| 11,12-EpETrE        | Epoxide           | C20:4n6              | d4-12,13-EpOME      | 14.13                | Negative                     | 319.203 > 167.1          | -21                  | -40                        |
| 8,9-EpETrE          | Epoxide           | C20:4n6              | d4-12,13-EpOME      | 14.25                | Negative                     | 319.202 > 155.1          | -18                  | -40                        |
| 10-Nitrooleate      | Nitrolipid        | C18:2n6              | d17-10-Nitrooleate  | 14.45                | Negative                     | 324.3 > 277.2            | -18                  | -40                        |
| d17-10-Nitrooleate  | SSTD <sup>c</sup> |                      | CUDA -esi           | 15.21                | Negative                     | 343.2 > 307.5            | -18                  | -65                        |
| 10-Nitrooleate      | Nitrolipid        | C18:1n9              | d17-10-Nitrooleate  | 15.30                | Negative                     | 326.2 > 279.5            | -24                  | -40                        |
| EPA screen          | Fatty Acid        |                      | d8-Arachidonic Acid | 15.38                | Negative                     | 301.4 > 257.2            | -15                  | -60                        |
| 9-Nitrooleate       | Nitrolipid        | C18:1n9              | d17-10-Nitrooleate  | 15.40                | Negative                     | 326.2 > 308.2            | -18                  | -50                        |
| ALA screen          | Fatty Acid        |                      | d8-Arachidonic Acid | 15.55                | Negative                     | 277.4 > 259.2            | -24                  | -115                       |
| DHA screen          | Fatty Acid        |                      | d8-Arachidonic Acid | 16.16                | Negative                     | 327.2 > 283.2            | -15                  | -45                        |
| d8-Arachidonic Acid | SSTD              |                      | CUDA -esi           | 16.43                | Negative                     | 311.3 > 267.1            | -18                  | -60                        |
| Arachidonate screen | Fatty Acid        |                      | d8-Arachidonic Acid | 16.50                | Negative                     | 303.4 > 259.2            | -18                  | -40                        |
| Linoleate screen    | Fatty Acid        |                      | d8-Arachidonic Acid | 16.89                | Negative                     | 279.4 > 261.2            | -38                  | -185                       |

ISTD - Internal Standard. This compound is added to the samples at the reconstitution step

SSTD - Surrogate. This compound is added to the samples prior to extraction

Supplemental Table S1

Supplemental Table S1B. UPLC/electrospray ionization QTrap analyte and instrument specific parameters for assayed oxylipins, nitrolipids, free fatty acids, endocannabinoids, and endocannabinoid-like compounds

| Lipid Mediator  | Analyte Class    | Fatty Acid Precursor | Internal Standard | Retention Time (min) | Electrospray Ionization Mode | Q1 > Q3 Transition (m/z) | Collision Energy (V) | Declustering Potential (V) |
|-----------------|------------------|----------------------|-------------------|----------------------|------------------------------|--------------------------|----------------------|----------------------------|
| PHAU +esi       | ISTD             |                      |                   | 3.02                 | Positive                     | 251.2 > 114.1            | 21                   | 65                         |
| d4-PGF2a EA     | SSTD             |                      | PHAU +esi         | 3.56                 | Positive                     | 384.3 > 62.1             | 42                   | 50                         |
| PGF2a EA        | Acylethanolamide | C20:4n6              | d4-PGF2a EA       | 3.56                 | Positive                     | 380.3 > 62.1             | 39                   | 45                         |
| PGE2 EA         | Acylethanolamide | C20:4n6              | d4-PGF2a EA       | 3.59                 | Positive                     | 378.301 > 62.1           | 39                   | 65                         |
| PGD2 EA         | Acylethanolamide | C20:4n6              | d4-PGF2a EA       | 3.91                 | Positive                     | 378.302 > 62.1           | 42                   | 65                         |
| PGF2a 1G        | Monoacylglycerol | C20:4n6              | d4-PGF2a EA       | 4.19                 | Positive                     | 411.3 > 301.2            | 21                   | 40                         |
| PGE2 1G         | Monoacylglycerol | C20:4n6              | d4-PGF2a EA       | 4.26                 | Positive                     | 409.3 > 317.2            | 21                   | 75                         |
| CUDA +esi       | ISTD             |                      |                   | 8.45                 | Positive                     | 341.3 > 216.2            | 24                   | 50                         |
| 15-HETE EA      | Acylethanolamide | C20:4n6              | d8-AEA            | 9.55                 | Positive                     | 346.3 > 62.1             | 21                   | 75                         |
| 11,12-EpETre EA | Acylethanolamide | C20:4n6              | d8-AEA            | 11.66                | Positive                     | 364.3 > 62.1             | 45                   | 75                         |
| aLEA            | Acylethanolamide | C18:3n3              | d8-AEA            | 13.33                | Positive                     | 322.2 > 62.1             | 21                   | 60                         |
| DHEA            | Acylethanolamide | C22:6n3              | d8-AEA            | 14.50                | Positive                     | 372.3 > 62.1             | 45                   | 55                         |
| d8-NA-Gly       | SSTD             |                      | CUDA +esi         | 14.58                | Positive                     | 370.3 > 76.1             | 21                   | 45                         |
| d8-AEA          | SSTD             |                      | CUDA +esi         | 14.62                | Positive                     | 356.3 > 63.1             | 45                   | 50                         |
| NA-Gly          | Acylglycine      | C20:4n6              | d8-NA-Gly         | 14.64                | Positive                     | 362.3 > 76.1             | 21                   | 65                         |
| AEA             | Acylethanolamide | C20:4n6              | d8-AEA            | 14.68                | Positive                     | 348.3 > 62.1             | 39                   | 70                         |
| LEA             | Acylethanolamide | C18:2n6              | d8-AEA            | 14.79                | Positive                     | 324.2 > 62.1             | 21                   | 70                         |
| Dihomo GLA EA   | Acylethanolamide | C18:3n6              | d4-PEA            | 15.36                | Positive                     | 350.3 > 62.1             | 36                   | 35                         |
| d5-2-AG         | SSTD             |                      | CUDA +esi         | 15.42                | Positive                     | 384.3 > 287.2            | 21                   | 60                         |
| 2-AG            | Monoacylglycerol | C20:4n6              | d5-2-AG           | 15.43                | Positive                     | 379.301 > 287.2          | 24                   | 110                        |
| 2-LG            | Monoacylglycerol | C18:2n6              | d8-NA-Gly         | 15.49                | Positive                     | 355.301 > 263.2          | 12                   | 25                         |
| d4-PEA          | SSTD             |                      | CUDA +esi         | 15.60                | Positive                     | 304.2 > 62.1             | 18                   | 90                         |
| PEA             | Acylethanolamide | C16:0                | d4-PEA            | 15.62                | Positive                     | 300.2 > 62.1             | 18                   | 70                         |
| 1-AG            | Monoacylglycerol | C20:4n6              | d5-2-AG           | 15.66                | Positive                     | 379.302 > 287.2          | 21                   | 95                         |

ISTD - Internal Standard. This compound is added to the samples at the reconstitution step

SSTD - Surrogate. This compound is added to the samples prior to extraction

**Supplemental Table S1**

**Supplemental Table S1B.** UPLC/electrospray ionization QTrap analyte and instrument specific parameters for assayed oxylipins, nitrolipids, free fatty acids, endocannabinoids, and endocannabinoid-like compounds

| Lipid Mediator | Analyte Class    | Fatty Acid Precursor | Internal Standard | Retention Time (min) | Electrospray Ionization Mode | Q1 > Q3 Transition (m/z) | Collision Energy (V) | Declustering Potential (V) |
|----------------|------------------|----------------------|-------------------|----------------------|------------------------------|--------------------------|----------------------|----------------------------|
| 1-LG           | Monoacylglycerol | C18:2n6              | d5-2-AG           | 15.81                | Positive                     | 355.302 > 263.2          | 12                   | 40                         |
| NO-Gly         | Acylglycine      | C18:1n9              | d8-NA-Gly         | 15.95                | Positive                     | 340.2 > 76.2             | 21                   | 60                         |
| DEA            | Acylethanolamide | C22:4n6              | d5-2-AG           | 16.02                | Positive                     | 376.3 > 62.1             | 45                   | 105                        |
| OEA            | Acylethanolamide | C18:1n9              | d4-PEA            | 16.04                | Positive                     | 326.2 > 62.1             | 21                   | 105                        |
| 2-OG           | Monoacylglycerol | C18:1n9              | d5-2-AG           | 16.87                | Positive                     | 357.301 > 265.2          | 15                   | 50                         |
| 1-OG           | Monoacylglycerol | C18:1n9              | d5-2-AG           | 17.19                | Positive                     | 357.302 > 265.2          | 15                   | 55                         |
| SEA            | Acylethanolamide | C18:0                | d4-PEA            | 17.67                | Positive                     | 328.2 > 62.1             | 21                   | 100                        |

ISTD - Internal Standard. This compound is added to the samples at the reconstitution step

SSTD - Surrogate. This compound is added to the samples prior to extraction

**Supplemental Table S2**

**Supplemental Table S2A.** Mobile phase gradient conditions for the analysis of ceramides and sphingoid bases by UPLC-MS/MS. A Waters Acquity UPLC<sup>®</sup> BEH C8 2.1 x 100 mm, 1.7  $\mu$ m column was used to separate analytes and column temperature was maintained at 60°C.

| <b>Time (min)</b> | <b>Mobile Phase A <sup>a</sup> (%)</b> | <b>Mobile Phase B <sup>b</sup> (%)</b> | <b>Flow Rate (mL/min)</b> |
|-------------------|----------------------------------------|----------------------------------------|---------------------------|
| 0.00              | 30                                     | 70                                     | 0.25                      |
| 2.00              | 20                                     | 80                                     | 0.25                      |
| 5.00              | 15                                     | 85                                     | 0.25                      |
| 5.50              | 10                                     | 90                                     | 0.25                      |
| 13.50             | 5                                      | 95                                     | 0.25                      |
| 13.75             | 1                                      | 99                                     | 0.25                      |
| 14.50             | 1                                      | 99                                     | 0.25                      |
| 14.70             | 30                                     | 70                                     | 0.25                      |
| 16.00             | 30                                     | 70                                     | 0.25                      |

<sup>a</sup> Mobile Phase A: 5 mM Ammonium Formate and 0.2% Formic Acid in Water

<sup>b</sup> Mobile Phase B: 5 mM Ammonium Formate and 0.2% Formic Acid in Methanol

Supplemental Table S2

Supplemental Table S2B. UPLC/electrospray ionization QTRAP analyte and instrument specific parameters for assayed ceramides and sphingoid bases.

| Lipid Mediator      | Analyte Class     | Fatty Acid Precursors <sup>a</sup> | Internal Standard   | Retention Time (min) | Electrospray Ionization Mode | Q1 > Q3 Transition (m/z) | Collision Energy (V) | Declustering Potential (V) |
|---------------------|-------------------|------------------------------------|---------------------|----------------------|------------------------------|--------------------------|----------------------|----------------------------|
| CUDA                | ISTD <sup>b</sup> |                                    |                     | 3.24                 | Positive                     | 341.3 > 216.2            | 24.00                | 60                         |
| 17:1 Sphingosine    | SSTD <sup>c</sup> |                                    | CUDA                | 3.64                 | Positive                     | 286.4 > 268.3            | 15.00                | 40                         |
| 17:1 Sphingosine-1P | SSTD <sup>c</sup> |                                    | CUDA                | 3.96                 | Positive                     | 366.4 > 250.3            | 24.00                | 65                         |
| 18:1 Sphingosine    | Sphingoid Base    |                                    | 17:1 Sphingosine    | 4.00                 | Positive                     | 300.4 > 282.4            | 15.00                | 40                         |
| 18:0 Sphinganine-1P | Sphingoid Base    |                                    | 17:1 Sphingosine-1P | 4.32                 | Positive                     | 382.4 > 266.4            | 24.00                | 70                         |
| 18:1 Sphingosine-1P | Sphingoid Base    |                                    | 17:1 Sphingosine-1P | 4.32                 | Positive                     | 380.4 > 264.4            | 24.00                | 70                         |
| C14 Ceramide        | [NS] Ceramide     | d C18:1/C14:0                      | C17 Ceramide        | 10.09                | Positive                     | 510.7 > 492.6            | 18.00                | 65                         |
| C16 Ceramide        | [NS] Ceramide     | d C18:1/C16:0                      | C17 Ceramide        | 11.04                | Positive                     | 538.8 > 264.4            | 36.00                | 50                         |
| C18:1 Ceramide      | [NS] Ceramide     | d C18:1/C18:1                      | C17 Ceramide        | 11.40                | Positive                     | 564.5 > 546.4            | 18.00                | 50                         |
| C17 Ceramide        | SSTD <sup>c</sup> |                                    | CUDA                | 11.52                | Positive                     | 552.8 > 534.5            | 18.00                | 55                         |
| C18 Ceramide        | [NS] Ceramide     | d C18:1/C18:0                      | C17 Ceramide        | 12.01                | Positive                     | 566.7 > 264.4            | 42.00                | 50                         |
| C18 dihydroceramide | [NdS] Ceramide    | d C18:0/C18:0                      | C17 Ceramide        | 12.27                | Positive                     | 568.7 > 266.4            | 45.00                | 45                         |
| C20 Ceramide        | [NS] Ceramide     | d C18:1/C20:0                      | C17 Ceramide        | 13.06                | Positive                     | 594.4 > 576.5            | 21.00                | 60                         |
| C24 Ceramide        | [NS] Ceramide     | d C18:1/C24:0                      | C17 Ceramide        | 15.32                | Positive                     | 650.9 > 264.4            | 48.00                | 60                         |
| C24 dihydroceramide | [NdS] Ceramide    | d C18:0/C24:0                      | C17 Ceramide        | 15.50                | Positive                     | 652.9 > 266.4            | 48.00                | 35                         |

<sup>a</sup> Ceramides are synthesized by the addition of a fatty acid chain (represented by the carbon chain to the right of the slash) to a sphingoid base (represented by the carbon chain to the left of the slash)

<sup>b</sup> ISTD = Internal Standard. This compound is added to the samples at the reconstitution step

<sup>c</sup> SSTD = Surrogate. This compound is added to the samples prior to extraction

## Supplemental Table S3

Supplemental Table S3. List of lipid mediator and fatty acid analytes with common database identifiers.

| Common Abbreviation | Common Name                          | IUPAC Name                                                              | Analyte Class      | Fatty Acid Precursor | HMDB ID <sup>a</sup> | PubChem CID <sup>b</sup> | InChI Key <sup>c</sup>      |
|---------------------|--------------------------------------|-------------------------------------------------------------------------|--------------------|----------------------|----------------------|--------------------------|-----------------------------|
| 9-HODE              | 9-hydroxyoctadecanoic acid           | (10E,12E)-9-hydroxyoctadeca-10,12-dienoic acid                          | Oxylipin - Alcohol | C18:2n6              | HMDB10223            | 5282945                  | NPDSHTNEKLQJH-SIGMCMVEYSA-N |
| 13-HODE             | 13-hydroxyoctadecadienoic acid       | (9Z,11E)-13-hydroxyoctadeca-9,11-dienoic acid                           | Oxylipin - Alcohol | C18:2n6              | HMDB04667            | 6443013                  | HNICUWMFWZBIFP-IRQZEMPSA-N  |
| 9-HOTrE             | 9-hydroxyoctadecatrienoic acid       | (9E,11E,15Z)-9-hydroxyoctadeca-9,11,15-trienoic acid                    | Oxylipin - Alcohol | C18:3n3              | HMDB10224            | 53480359                 | YUPHIKSLGATJK-OBKXPJAFSA-N  |
| 13-HOTrE            | 13-hydroxyoctadecatrienoic acid      | (9Z,11E,15Z)-13-hydroxyoctadeca-9,11,15-trienoic acid                   | Oxylipin - Alcohol | C18:3n3              | HMDB10203            | 10469728                 | KLLGGGQNRVTBSU-JDTPQGGVSA-N |
| 5-HETE              | 5-hydroxyeicosatetraenoic acid       | (6E,8Z,11Z,14Z)-5-hydroxyicososa-6,8,11,14-tetraenoic acid              | Oxylipin - Alcohol | C20:4n6              | HMDB11134            | 5280733                  | KGIJOYOSFUGJG-JGKLHWIESA-N  |
| 8-HETE              | 8-hydroxyeicosatetraenoic acid       | (5Z,9E,11Z,14Z)-8-hydroxyicososa-5,9,11,14-tetraenoic acid              | Oxylipin - Alcohol | C20:4n6              | HMDB04679            | 5283154                  | NLUNAYAEIJYXR-BVYOQERLCSA-N |
| 9-HETE              | 9-hydroxyeicosatetraenoic acid       | (5E,7Z,11Z,14Z)-9-hydroxyicososa-5,7,11,14-tetraenoic acid              | Oxylipin - Alcohol | C20:4n6              | HMDB10222            | 5312978                  | KATYOYZUTNAWSA-DLJQHUEDSA-N |
| 11-HETE             | 11-hydroxyeicosatetraenoic acid      | (5E,8Z,12Z,14Z)-11-hydroxyicososa-5,8,12,14-tetraenoic acid             | Oxylipin - Alcohol | C20:4n6              | HMDB04682            | 5312981                  | GCZRCCHPLVMJE-RSPKXIRXSA-N  |
| 12-HETE             | 12-hydroxyeicosatetraenoic acid      | (5E,8Z,10Z,14Z)-12-hydroxyicososa-5,8,10,14-tetraenoic acid             | Oxylipin - Alcohol | C20:4n6              | HMDB06111            | 5312983                  | ZNHVWPKMFKADKW-FYMKONMSA-N  |
| 15-HETE             | 15-hydroxyeicosatetraenoic acid      | (5Z,8Z,11Z,13E)-15-hydroxyicososa-5,8,11,13-tetraenoic acid             | Oxylipin - Alcohol | C20:4n6              | HMDB03876            | 5280724                  | JSFATNQLKRBCI-VAEKSGALSA-N  |
| 20-HETE             | 20-hydroxyeicosatetraenoic acid      | (5Z,8Z,11Z,14Z)-20-hydroxyicososa-5,8,11,14-tetraenoic acid             | Oxylipin - Alcohol | C20:4n6              | HMDB05998            | 5283157                  | NNDIXBJHNLFPJ-DTLRWTWJSA-N  |
| 5-HEPE              | 5-Hydroxyeicosapentaenoic acid       | (6E,8Z,11Z,14Z,17Z)-5-hydroxyicososa-6,8,11,14,17-pentaenoic acid       | Oxylipin - Alcohol | C20:5n3              | HMDB05081            | 6439678                  | FTAGROQYQYRHF-FCWZHQCSA-N   |
| 9-HEPE              | 9-Hydroxyeicosapentaenoic acid       | (5Z,7E,11Z,14Z,17Z)-9-hydroxyicososa-5,7,11,14,17-pentaenoic acid       | Oxylipin - Alcohol | C20:5n3              | HMDB06053            | 5283187                  | OXOPDZWPWFJEW-FPRWAWDYSA-N  |
| 12-HEPE             | 12-Hydroxyeicosapentaenoic acid      | (5Z,8Z,10E,14Z,17Z)-12-hydroxyicososa-5,8,10,14,17-pentaenoic acid      | Oxylipin - Alcohol | C20:5n3              | HMDB10202            | 10041593                 | MCRJLMXYVFXLS-QGQBRVLSA-N   |
| 15-HEPE             | 15-Hydroxyeicosapentaenoic acid      | (5Z,8Z,11Z,13E,17Z)-16-hydroxyicososa-5,8,11,13,17-pentaenoic acid      | Oxylipin - Alcohol | C20:5n3              | HMDB10209            | 53480357                 | UDXLGJLBYLSZ-XBCQTNLFSAN    |
| 4-HdOHE             | 4-hydroxydocosahexaenoic acid        | (5E,7Z,10Z,13Z,16Z,19Z)-4-hydroxydocosa-5,7,10,13,16,19-hexaenoic acid  | Oxylipin - Alcohol | C22:6n3              | HMDB60049            | 53394255                 | IFRKNCPVJIAU-HFFFAOYSA-N    |
| 14-HdOHE            | 14-hydroxydocosahexaenoic acid       | (4Z,7Z,10Z,12E,16Z,19Z)-14-hydroxydocosa-4,7,10,12,16,19-hexaenoic acid | Oxylipin - Alcohol | C22:6n3              | HMDB60044            | 11566378                 | ZNEBXONKCYFJAF-BGKMTWLOSA-N |
| 17-HdOHE            | 17-hydroxydocosahexaenoic acid       | (4Z,7Z,10Z,13Z,15E,19Z)-17-hydroxydocosa-4,7,10,13,15,19-hexaenoic acid | Oxylipin - Alcohol | C22:6n3              | HMDB10213            | 6439179                  | SWTYBBUBEPYCX-VIIQIGXSAN    |
| 9,10-e-DiHO         | 9,10-dihydroxyoctadecanoic acid      | 9,10-dihydroxyoctadecanoic acid                                         | Oxylipin - Diol    | C18:0                | -                    | 441460                   | VACHUYIREGFMSP-SJORKVTESA-N |
| 9,10-DiHOME         | 9,10-dihydroxyoctadecenoic acid      | (Z)-9,10-dihydroxyoctadec-12-enoic acid                                 | Oxylipin - Diol    | C18:2n6              | HMDB04704            | 9966640                  | XEBKSQSGNGRDW-YFHOEEVSA-N   |
| 12,13-DiHOME        | 12,13-dihydroxyoctadecenoic acid     | (Z)-12,13-dihydroxyoctadec-9-enoic acid                                 | Oxylipin - Diol    | C18:2n6              | HMDB04705            | 10236635                 | CQSLTKIXAJTQGA-FLIBITNWSA-N |
| 9,10-DiHODE         | 9,10-dihydroxyoctadecadienoic acid   | (12Z,15Z)-9,10-dihydroxyoctadeca-12,15-dienoic acid                     | Oxylipin - Diol    | C18:3n3              | HMDB10221            | 16061066                 | QRHSEDZBZMPOA-ZJSQCTGTSAN   |
| 12,13-DiHODE        | 12,13-dihydroxyoctadecadienoic acid  | (9Z,15Z)-12,13-dihydroxyoctadeca-9,15-dienoic acid                      | Oxylipin - Diol    | C18:3n3              | HMDB10201            | 16061067                 | RGRKFKRAFZQMS-OOHFSOINSA-N  |
| 15,16-DiHODE        | 15,16-dihydroxyoctadecadienoic acid  | (9Z,12Z)-15,16-dihydroxyoctadeca-9,12-dienoic acid                      | Oxylipin - Diol    | C18:3n3              | HMDB10208            | 16061068                 | LKLLJYJYTPVCID-OHPMOLHNSA-N |
| 5,6-DiHETrE         | 5,6-dihydroxyeicosatrienoic acid     | (8Z,11Z,14Z)-5,6-dihydroxyicososa-8,11,14-trienoic acid                 | Oxylipin - Diol    | C20:4n6              | HMDB02343            | 5283142                  | GFNYAPAJUNPMGH-QNEBEIHSSA-N |
| 8,9-DiHETrE         | 8,9-dihydroxyeicosatrienoic acid     | (5Z,11Z,14Z)-8,9-dihydroxyicososa-5,11,14-trienoic acid                 | Oxylipin - Diol    | C20:4n6              | HMDB02311            | 5283144                  | DCJBINATHQHPKO-TYAUOURKSA-N |
| 11,12-DiHETrE       | 11,12-dihydroxyeicosatrienoic acid   | (5Z,8Z,14Z)-11,12-dihydroxyicososa-5,8,14-trienoic acid                 | Oxylipin - Diol    | C20:4n6              | HMDB02314            | 5283146                  | LRPPQRCHPFBPE-KROJNAHFSAN   |
| 14,15-DiHETrE       | 14,15-dihydroxyeicosatrienoic acid   | (5Z,8Z,11Z)-14,15-dihydroxyicososa-5,8,11-trienoic acid                 | Oxylipin - Diol    | C20:4n6              | HMDB02265            | 5283147                  | SYAWGTIVOGUZMM-ILYOTBPNSAN  |
| 5,15-DiHETE         | 5,15-dihydroxyeicosatetraenoic acid  | (6E,8Z,11Z,13E)-5,15-dihydroxyicososa-6,8,11,13-tetraenoic acid         | Oxylipin - Diol    | C20:5n3              | HMDB10216            | 5283158                  | UXGCGPWSGUMNI-BVHTXILBSAN   |
| 8,15-DiHETE         | 8,15-dihydroxyeicosatetraenoic acid  | (5Z,9E,11Z,13E)-8,15-dihydroxyicososa-5,9,11,13-tetraenoic acid         | Oxylipin - Diol    | C20:5n3              | HMDB10219            | 53480358                 | NNPWRKSGORGTIM-RCDCWWQHSAN  |
| 14,15-DiHETE        | 14,15-dihydroxyeicosatetraenoic acid | (5Z,8Z,11Z,17Z)-14,15-dihydroxyicososa-5,8,11,17-tetraenoic acid        | Oxylipin - Diol    | C20:5n3              | HMDB10204            | 16061119                 | BLWCDPIELVFRJY-QXBTPTPVSA-N |
| 17,18-DiHETE        | 17,18-dihydroxyeicosatetraenoic acid | (5Z,8Z,11Z,14Z)-17,18-dihydroxyicososa-5,8,11,14-tetraenoic acid        | Oxylipin - Diol    | C20:5n3              | HMDB10211            | 16061120                 | XYDVGNAAQFZFJ-PURVOHMSAN    |

<sup>a</sup> Compound identification number for the Human Metabolome Database (<http://www.hmdb.ca/>). Analytes not listed in the Human Metabolome Database are designated with "-"

<sup>b</sup> Compound identification number for the National Center for Biotechnology Information's PubChem database (<https://pubchem.ncbi.nlm.nih.gov/>)

<sup>c</sup> IUPAC International Chemical Identifier

<sup>d</sup> This analyte represents the sum of the peaks of all observed isomers of the linoleate-derived triols. Concentrations are calculated relative to concentrations of authentic 9,12,13-TriHOME standards, the nomenclature of which is shown here

## Supplemental Table S3

Supplemental Table S3. List of lipid mediator and fatty acid analytes with common database identifiers.

| Common Abbreviation | Common Name                            | IUPAC Name                                                                                    | Analyte Class            | Fatty Acid Precursor | HMDB ID <sup>a</sup> | PubChem CID <sup>b</sup> | InChI Key <sup>c</sup>        |
|---------------------|----------------------------------------|-----------------------------------------------------------------------------------------------|--------------------------|----------------------|----------------------|--------------------------|-------------------------------|
| 19,20-DiHDoPE       | 19,20-dihydroxydocosapentaenoic acid   | (4Z,7Z,10Z,13Z,16Z)-19,20-dihydroxydocosa-4,7,10,13,16-pentaenoic acid                        | Oxylipin - Diol          | C22:6n3              | HMDB10214            | 16061148                 | FFXKPSNQCPCPNORO-MBYQGORISA-N |
| 9,10-EpOME          | 9,10-epoxyoctadecenoic acid            | 8-[3-[(E)-oct-2-enyl]oxiran-2-yl]octanoic acid                                                | Oxylipin - Epoxide       | C18:2n6              | HMDB04704            | 5283018                  | FBUKMFOXMZRGRB-JXMROGBWSA-N   |
| 12,13-EpOME         | 12,13-epoxyoctadecenoic acid           | (Z)-11-(3-pentylloxiran-2-yl)undec-9-enoic acid                                               | Oxylipin - Epoxide       | C18:2n6              | HMDB04702            | 5356421                  | CCPLLJZDQAOHD-FLBITNWSA-N     |
| 9,10-EpODE          | 9,10-epoxyoctadecadienoic acid         | 8-[3-[(2Z,5Z)-octa-2,5-dienyl]oxiran-2-yl]octanoic acid                                       | Oxylipin - Epoxide       | C18:3n3              | HMDB10220            | 16061060                 | JTEGNHWHWBJZ-ZJSQCTGTSA-N     |
| 12,13-EpODE         | 12,13-epoxyoctadecadienoic acid        | (Z)-11-[3-[(Z)-pent-2-enyl]oxiran-2-yl]undec-9-enoic acid                                     | Oxylipin - Epoxide       | C18:3n3              | HMDB10200            | 16061061                 | BKKGUKSHPTUGE-OOHFSOINSA-N    |
| 15,16-EpODE         | 15,16-epoxyoctadecadienoic acid        | (9Z,12Z)-14-(3-ethylloxiran-2-yl)tetradeca-9,12-dienoic acid                                  | Oxylipin - Epoxide       | C18:3n3              | HMDB10206            | 16061062                 | HKSDVJONLXYKL-OHPMOLHNSA-N    |
| 8,9-EpETrE          | 8,9-epoxyeicosatrienoic acid           | (Z)-7-[3-[(2Z,5Z)-undeca-2,5-dienyl]oxiran-2-yl]hept-5-enoic acid                             | Oxylipin - Epoxide       | C20:4n6              | HMDB02232            | 5283203                  | DBWQSCSXHFNTMO-TYAUOURKSA-N   |
| 11,12-EpETrE        | 11,12-epoxyeicosatrienoic acid         | (5E,8Z)-10-[3-[(E)-oct-2-enyl]oxiran-2-yl]deca-5,8-dienoic acid                               | Oxylipin - Epoxide       | C20:4n6              | HMDB10409            | 53480479                 | DXOYVQHGIODESM-IQCOFVSKSA-N   |
| 14,15-EpETrE        | 14,15-epoxyeicosatrienoic acid         | (5Z,8Z,12E)-11-hydroxy-13-(3-pentylloxiran-2-yl)trideca-5,8,12-trienoic acid                  | Oxylipin - Epoxide       | C20:4n6              | HMDB04693            | 11954058                 | WLMZMBKVRPUYIG-LTCHCNXGSA-N   |
| 11,12-EpETE         | 11,12-epoxyeicosatetraenoic acid       | (5Z,8Z)-10-[3-[(2Z,5Z)-octa-2,5-dienyl]oxiran-2-yl]deca-5,8-dienoic acid                      | Oxylipin - Epoxide       | C20:5n3              | -                    | 16061087                 | QHOKDYBJBJDGY-BVILWJSOJSA-N   |
| 14,15-EpETE         | 14,15-epoxyeicosatetraenoic acid       | (5Z,8Z,11Z)-13-[3-[(Z)-pent-2-enyl]oxiran-2-yl]trideca-5,8,11-trienoic acid                   | Oxylipin - Epoxide       | C20:5n3              | HMDB10205            | 16061088                 | RGXIZYRQZWDMM-QXBXTPPVSA-N    |
| 17,18-EpETE         | 17,18-epoxyeicosatetraenoic acid       | (5Z,8Z,11Z,14Z)-16-(3-ethylloxiran-2-yl)hexadeca-5,8,11,14-tetraenoic acid                    | Oxylipin - Epoxide       | C20:5n3              | HMDB10212            | 16061089                 | GPQVJQEBXAKBJ-IPURVOHMSA-N    |
| 16,17-EpDPPE        | 16,17-epoxydocosapentaenoic acid       | (4Z,7Z,10Z,13Z)-15-[3-[(Z)-pent-2-enyl]oxiran-2-yl]pentadeca-4,7,10,13-tetraenoic acid        | Oxylipin - Epoxide       | C22:6n3              | HMDB13621            | 14392758                 | BCTXZWCPLWCRV-ZYAFMMDSA-N     |
| 19,20-EpDPPE        | 19,20-epoxydocosapentaenoic acid       | (4Z,7Z,10Z,13Z,16Z)-18-(3-ethylloxiran-2-yl)octadeca-4,7,10,13,16-pentaenoic acid             | Oxylipin - Epoxide       | C22:6n3              | HMDB13620            | 11631565                 | OSXOPUBJDUAOJ-MBYQGORISA-N    |
| 9-HpODE             | 9-hydroperoxyoctadecadienoic acid      | (10E,12Z)-9-hydroperoxyoctadeca-10,12-dienoic acid                                            | Oxylipin - Hydroperoxide | C18:2n6              | HMDB06940            | 6439847                  | JGUNZIWGNQSBM-ZJHFMPGASA-N    |
| 13-HpODE            | 13-hydroperoxyoctadecadienoic acid     | (9Z,11E)-13-hydroperoxyoctadeca-9,11-dienoic acid                                             | Oxylipin - Hydroperoxide | C18:2n6              | HMDB03871            | 5280720                  | JDSRHVWSAMTSSN-IRQZEAMPSA-N   |
| 5-HpETE             | 5-hydroperoxyicosatetraenoic acid      | (6E,8Z,11Z,14Z)-5-hydroperoxyicoso-6,8,11,14-tetraenoic acid                                  | Oxylipin - Hydroperoxide | C20:4n6              | HMDB11135            | 5283171                  | JNUUNUQHIXOFDA-XTDASVJISA-N   |
| 12-HpETE            | 12-hydroperoxyicosatetraenoic acid     | (5Z,8Z,10E,14Z)-12-hydroperoxyicoso-5,8,10,14-tetraenoic acid                                 | Oxylipin - Hydroperoxide | C20:4n6              | HMDB04243            | 5280892                  | ZIOZYRSDNLNNL-LQWCMKPYSA-N    |
| 15-HpETE            | 15-hydroperoxyicosatetraenoic acid     | (5Z,8Z,11Z,13E)-15-hydroperoxyicoso-5,8,11,13-tetraenoic acid                                 | Oxylipin - Hydroperoxide | C20:4n6              | HMDB04244            | 5280893                  | BFWYTORDSFIVKP-VAEKSGALSA-N   |
| 9-KODE              | 9-oxo-octadecadienoic acid             | (10E,12Z)-9-oxooctadeca-10,12-dienoic acid                                                    | Oxylipin - Ketone        | C18:2n6              | HMDB04669            | 9839084                  | LUZSWWYKLLTDHU-ZJHFMPGASA-N   |
| 13-KODE             | 13-oxo-octadecadienoic acid            | (9Z,11E)-13-oxooctadeca-9,11-dienoic acid                                                     | Oxylipin - Ketone        | C18:2n6              | HMDB04668            | 6446027                  | JHXAZBBVQSRJRK-BSZOFBHHSA-N   |
| 12,13-Ep-9-KODE     | 9-oxo-12,13-epoxy-10-octadecenoic acid | (E)-9-oxo-11-(3-pentylloxiran-2-yl)undec-10-enoic acid                                        | Oxylipin - Ketone        | C18:3n3              | HMDB13623            | 5283007                  | RCMABBHQYMBYKV-BUHFOSPRSA-N   |
| 5-KETE              | 5-oxo-eicosatetraenoic acid            | (6E,8Z,11Z,14Z)-5-oxoicoso-6,8,11,14-tetraenoic acid                                          | Oxylipin - Ketone        | C20:4n6              | HMDB10217            | 5283159                  | MEASLHGLYBFXFO-XTDASVJISA-N   |
| 15-KETE             | 15-oxo-eicosatetraenoic acid           | (5Z,8Z,11Z,13E)-15-oxoicoso-5,8,11,13-tetraenoic acid                                         | Oxylipin - Ketone        | C20:4n6              | HMDB10210            | 5280701                  | YGYTUEISKATQSM-USWFWKISSA-N   |
| 6-trans-LTB4        | 6-trans-Leukotriene B4                 | (5S,6E,8E,10E,12R,14Z)-5,12-dihydroxyicoso-6,8,10,14-tetraenoic acid                          | Oxylipin - Leukotriene   | C20:4n6              | HMDB05087            | 5283128                  | VNYSSYRCGWBLHG-LMNWISKWSA-N   |
| LTB4                | Leukotriene B4                         | (5S,6Z,8E,10E,12R,14Z)-5,12-dihydroxyicoso-6,8,10,14-tetraenoic acid                          | Oxylipin - Leukotriene   | C20:4n6              | HMDB02886            | 5280492                  | VNYSSYRCGWBLHG-AMOLWMLGSA-N   |
| LTB5                | Leukotriene B5                         | (5S,6Z,8E,10E,12R,14Z,17Z)-5,12-dihydroxyicoso-6,8,10,14,17-pentaenoic acid                   | Oxylipin - Leukotriene   | C20:5n3              | HMDB05073            | 5283125                  | BISQPGCQHLHQK-HDNPQISLSA-N    |
| PGE1                | Prostaglandin E1                       | 7-[(1R,2R,3R)-3-hydroxy-2-[(E,3S)-3-hydroxyoct-1-enyl]-5-oxocyclopentyl]heptanoic acid        | Oxylipin - Prostanoid    | C20:3n6              | HMDB01442            | 5280723                  | GMVPRGQIOIHIMI-DWKJAMRDSA-N   |
| PGD2                | Prostaglandin D2                       | (Z)-7-[(1R,2R,5S)-5-hydroxy-2-[(E,3S)-3-hydroxyoct-1-enyl]-3-oxocyclopentyl]hept-5-enoic acid | Oxylipin - Prostanoid    | C20:4n6              | HMDB01403            | 448457                   | BHMBVRSMPRCGG-OUTUXVNSA-N     |
| PGE2                | Prostaglandin E2                       | (Z)-7-[(1R,2R,3R)-3-hydroxy-2-[(E,3S)-3-hydroxyoct-1-enyl]-5-oxocyclopentyl]hept-5-enoic acid | Oxylipin - Prostanoid    | C20:4n6              | HMDB01220            | 5280360                  | XEYBRNLFZDVAW-ABSRFYASSA-N    |
| 15-keto PGE2        | 15-keto Prostaglandin E2               | (Z)-7-[(1R,2R,3R)-3-hydroxy-5-oxo-2-[(E)-3-oxooct-1-enyl]cyclopentyl]hept-5-enoic acid        | Oxylipin - Prostanoid    | C20:4n6              | HMDB03175            | 5280719                  | YRTJDWRBOKPZNV-KMXMBPPJISA-N  |
| 6-keto PGF1a        | 6-keto Prostaglandin F1 alpha          | 7-[(1R,2R,3R,5S)-3,5-dihydroxy-2-[(E,3S)-3-hydroxyoct-1-enyl]cyclopentyl]-6-oxoheptanoic acid | Oxylipin - Prostanoid    | C20:4n6              | HMDB02886            | 5280888                  | KFGFTHODYBSGM-ZUNNJUQCSA-N    |

<sup>a</sup> Compound identification number for the Human Metabolome Database (<http://www.hmdb.ca/>). Analytes not listed in the Human Metabolome Database are designated with "-"

<sup>b</sup> Compound identification number for the National Center for Biotechnology Information's PubChem database (<https://pubchem.ncbi.nlm.nih.gov/>)

<sup>c</sup> IUPAC International Chemical Identifier

<sup>d</sup> This analyte represents the sum of the peaks of all observed isomers of the linoleate-derived triols. Concentrations are calculated relative to concentrations of authentic 9,12,13-TriHOME standards, the nomenclature of which is shown here

## Supplemental Table S3

Supplemental Table S3. List of lipid mediator and fatty acid analytes with common database identifiers.

| Common Abbreviation       | Common Name                                  | IUPAC Name                                                                                                     | Analyte Class         | Fatty Acid Precursor | HMDB ID <sup>a</sup> | PubChem CID <sup>b</sup> | InChI Key <sup>c</sup>       |
|---------------------------|----------------------------------------------|----------------------------------------------------------------------------------------------------------------|-----------------------|----------------------|----------------------|--------------------------|------------------------------|
| PGF2a                     | Prostaglandin F2alpha                        | (Z)-7-[(1R,2R,3R,5S)-3,5-dihydroxy-2-[(E,3S)-3-hydroxyoct-1-enyl]cyclopentyl]hept-5-enoic acid                 | Oxylipin - Prostanoid | C20:4n6              | HMDB01139            | 5280363                  | PXGPLTODNUVGLFYNNPMVKQSA-N   |
| 15-deoxy PGJ2             | 15-deoxy Prostaglandin J2                    | (Z)-7-[(1S,5E)-5-[(E)-oct-2-enylidene]-4-oxocyclopent-2-en-1-yl]hept-5-enoic acid                              | Oxylipin - Prostanoid | C20:4n6              | HMDB05079            | 5311211                  | VHRUMKCAEVRUBK-GODQJPCRSA-N  |
| TXB2                      | Thromboxane B2                               | (Z)-7-[(2R,3S,4S)-4,6-dihydroxy-2-[(E,3S)-3-hydroxyoct-1-enyl]oxan-3-yl]hept-5-enoic acid                      | Oxylipin - Prostanoid | C20:4n6              | HMDB03252            | 5283137                  | XNRNNGPBEPNRAR-JQBLCGNGSA-N  |
| PGE3                      | Prostaglandin E3                             | (Z)-7-[(1R,2R,3R)-3-hydroxy-2-[(1E,3S,5Z)-3-hydroxyocta-1,5-dienyl]-5-oxocyclopentyl]hept-5-enoic acid         | Oxylipin - Prostanoid | C20:5n3              | HMDB02664            | 5280937                  | CBOMORHONRZRN-QLOYDKTKSA-N   |
| PGF3a                     | Prostaglandin F3alpha                        | (Z)-7-[(1R,2R,3R,5S)-3,5-dihydroxy-2-[(1E,3S,5Z)-3-hydroxyocta-1,5-dienyl]cyclopentyl]hept-5-enoic acid        | Oxylipin - Prostanoid | C20:5n3              | -                    | 5280940                  | SAKGBZWJAIABSY-SAMSIYEGSA-N  |
| Sum TriHOMEs <sup>d</sup> | 9,12,13-Trihydroxyoctadecenoic acid          | (10E)-9,12,13-trihydroxyoctadec-10-enoic acid                                                                  | Oxylipin - Triol      | C18:2n6              | HMDB04708            | 9858729                  | MDIUMSLCYIJBQC-MVFSOIOZSA-N  |
| LXA4                      | Lipoxin A4                                   | (5S,6R,7E,9E,11Z,13E,15S)-5,6,15-trihydroxycosa-7,9,11,13-tetraenoic acid                                      | Oxylipin - Triol      | C20:4n6              | HMDB04385            | 5280914                  | IXAQOQZEOGMIS-SSQXEBMSA-N    |
| RvD1                      | Resolvin D1                                  | (4Z,7S,9E,11E,13Z,15E,17S,19Z)-7,8,17-trihydroxydocosa-4,9,11,13,15,19-hexaenoic acid                          | Oxylipin - Triol      | C20:4n6              | HMDB03733            | 16061135                 | OIWTWACQMDFHJG-NIIQAZPPSA-N  |
| 9-Nitrooleate             | 9-Nitrooleic acid                            | 9-nitrooctadec-9-enoic acid                                                                                    | Nitrolipid            | C18:1n9              | -                    | 53412232                 | CQOAKBVRVRVHWKV-UHFFFAOYSA-M |
| 10-Nitrooleate            | 10-Nitrooleic acid                           | 10-nitrooctadec-9-enoic acid                                                                                   | Nitrolipid            | C18:1n9              | -                    | 53394576                 | WRADPCFZZWXOTI-UHFFFAOYSA-N  |
| 10-Nitrolinoleate         | 10-Nitrolinoleic acid                        | (9E,12Z)-10-nitrooctadeca-9,12-dienoic acid                                                                    | Nitrolipid            | C18:2n6              | -                    | 5282259                  | LELVHAQTWXTCLY-UHFFFAOYSA-N  |
| C18:2n6                   | Linoleic Acid                                | (9Z,12Z)-octadeca-9,12-dienoic acid                                                                            | Free Fatty Acid       |                      | HMDB00673            | 5280450                  | OYHQLOUKZRVURQ-HZJYTRNSA-N   |
| C18:3n3                   | alpha-Linolenic Acid                         | (9Z,12Z,15Z)-octadeca-9,12,15-trienoic acid                                                                    | Free Fatty Acid       |                      | HMDB01388            | 5280934                  | DTOSIQBPVRVQHS-PDBXOOCHSA-N  |
| C20:4n6                   | Arachidonic Acid                             | (5Z,8Z,11Z,14Z)-icosa-5,8,11,14-tetraenoic acid                                                                | Free Fatty Acid       |                      | HMDB01043            | 444899                   | YZXBAPSXZXRGB-DOFZRALJSA-N   |
| C20:5n3                   | Eicosapentaenoic Acid                        | (5Z,8Z,11Z,14Z,17Z)-icosa-5,8,11,14,17-pentaenoic acid                                                         | Free Fatty Acid       |                      | HMDB01999            | 446284                   | JAZBEHYOPTENJ-JLNKQTSITSA-N  |
| C22:6n3                   | Docosahexanoic Acid                          | (4Z,7Z,10Z,13Z,16Z,19Z)-docosa-4,7,10,13,16,19-hexaenoic acid                                                  | Free Fatty Acid       |                      | HMDB62579            | 445580                   | MBMBGCFQFBJSGT-KUBAVDMBSA-N  |
| PEA                       | Palmitoylethanolamide                        | N-(2-hydroxyethyl)hexadecanamide                                                                               | Acylethanolamide      | C16:0                | HMDB02100            | 4671                     | HXYVTAGFYLHMSO-UHFFFAOYSA-N  |
| SEA                       | Stearoylethanolamide                         | N-(2-hydroxyethyl)octadecanamide                                                                               | Acylethanolamide      | C18:0                | HMDB13078            | 27902                    | OTQIQQTPXJQRG-UHFFFAOYSA-N   |
| OEA                       | Oleoylethanolamide                           | (Z)-N-(2-hydroxyethyl)octadec-9-enamide                                                                        | Acylethanolamide      | C18:1n9              | HMDB02088            | 5283454                  | BOWVQLFMWZBEF-KTKRTIGZSA-N   |
| LEA                       | Linoleoylethanolamide                        | (9Z,12Z)-N-(2-hydroxyethyl)octadeca-9,12-dienamide                                                             | Acylethanolamide      | C18:2n6              | HMDB12252            | 5283446                  | KQXDGVUSAAQARU-HZJYTRNSA-N   |
| aLEA                      | alpha-Linolenylethanolamide                  | (9Z,12Z,15Z)-N-(2-hydroxyethyl)octadeca-9,12,15-trienamide                                                     | Acylethanolamide      | C18:3n3              | HMDB13624            | 5283449                  | HBJXRRXWHSZPU-PDBXOOCHSA-N   |
| Dihomo GLA EA             | Dihomo-gamma-linolenylethanolamide           | (8Z,11Z,14Z)-N-(2-hydroxyethyl)icosa-8,11,14-trienamide                                                        | Acylethanolamide      | C18:3n6              | HMDB13625            | 5282272                  | ULQWKETUACYZLI-QNEBEIHSSA-N  |
| 11,12-EpETre EA           | 11,12-epoxyeicosatrienoic acid ethanolamide  | (5Z,8Z)-N-(2-hydroxyethyl)-10-[3-[(Z)-oct-2-enyl]oxiran-2-yl]deca-5,8-dienamide                                | Acylethanolamide      | C20:4n6              | HMDB13652            | 16061183                 | TYRRSRADDAROSO-KROJNAHFA-S-N |
| 15-HETE EA                | 15-hydroxyeicosatetraenoic acid ethanolamide | (5Z,8Z,11Z,13E,15S)-15-hydroxy-N-(2-hydroxyethyl)icosa-5,8,11,13-tetraenamide                                  | Acylethanolamide      | C20:4n6              | -                    | 91886095                 | XZQKRCUYLKDPEK-BPVVZGHASA-N  |
| AEA                       | Arachidonylethanolamide / Anandamide         | (5Z,8Z,11Z,14Z)-N-(2-hydroxyethyl)icosa-5,8,11,14-tetraenamide                                                 | Acylethanolamide      | C20:4n6              | HMDB04080            | 5281969                  | LGEQWQMCRIYKG-DOFZRALJSA-N   |
| PGD2 EA                   | Prostaglandin D2 ethanolamide                | (Z)-N-(2-hydroxyethyl)-7-[(1R,2R,5S)-5-hydroxy-2-[(E,3S)-3-hydroxyoct-1-enyl]-3-oxocyclopentyl]hept-5-enamide  | Acylethanolamide      | C20:4n6              | HMDB13629            | 5283120                  | KEYYJKSQFUAAGF-YIRKRNQHSAN   |
| PGE2 EA                   | Prostaglandin E2 ethanolamide                | (Z)-N-(2-hydroxyethyl)-7-[(1R,2R,3R)-3-hydroxy-2-[(E,3S)-3-hydroxyoct-1-enyl]-5-oxocyclopentyl]hept-5-enamide  | Acylethanolamide      | C20:4n6              | -                    | 5283119                  | GKKWUSPPIQURFM-IGDGGSTLSA-N  |
| PGF2a EA                  | Prostaglandin F2alpha ethanolamide           | (E)-7-[(1R,2R,3R,5S)-3,5-dihydroxy-2-[(E,3S)-3-hydroxyoct-1-enyl]cyclopentyl]-N-(2-hydroxyethyl)hept-5-enamide | Acylethanolamide      | C20:4n6              | HMDB13628            | 53481911                 | XCVCILRZCCGEMU-FPLRWIMGSA-N  |
| DEA                       | Docosatraenylethanolamine                    | (7Z,10Z,13Z,16Z)-N-(2-hydroxyethyl)docosa-7,10,13,16-tetraenamide                                              | Acylethanolamide      | C22:4n6              | HMDB13626            | 5282273                  | FMVHVRYPQIXOAF-DOFZRALJSA-N  |
| DHEA                      | Docosahexanoylethanolamide                   | 2-hydroxyethyl (4Z,7Z,10Z,13Z,16Z,19Z)-docosa-4,7,10,13,16,19-hexaenoate                                       | Acylethanolamide      | C22:6n3              | HMDB13627            | 53245830                 | CXWASNUDKUTFPQ-KUBAVDMBSA-N  |
| 1-OG                      | 1-oleoylglycerol                             | 2,3-dihydroxypropyl (Z)-octadec-9-enoate                                                                       | Monoacylglycerol      | C18:1n9              | HMDB11567            | 12178130                 | RZRWAYUHWVFMIP-QJRAZLAKSA-N  |
| 2-OG                      | 2-oleoylglycerol                             | 1,3-dihydroxypropan-2-yl (Z)-octadec-9-enoate                                                                  | Monoacylglycerol      | C18:1n9              | HMDB11537            | 5319879                  | UPWQKQDVAURUGE-KTKRTIGZSA-N  |

<sup>a</sup> Compound identification number for the Human Metabolome Database (<http://www.hmdb.ca/>). Analytes not listed in the Human Metabolome Database are designated with "-"<sup>b</sup> Compound identification number for the National Center for Biotechnology Information's PubChem database (<https://pubchem.ncbi.nlm.nih.gov/>)<sup>c</sup> IUPAC International Chemical Identifier<sup>d</sup> This analyte represents the sum of the peaks of all observed isomers of the linoleate-derived triols. Concentrations are calculated relative to concentrations of authentic 9,12,13-TriHOME standards, the nomenclature of which is shown here



## Supplemental Table S3

Supplemental Table S3. List of lipid mediator and fatty acid analytes with common database identifiers.

| Common Abbreviation | Common Name                      | IUPAC Name                                                                                                           | Analyte Class                     | Fatty Acid Precursor | HMDB ID <sup>a</sup> | PubChem CID <sup>b</sup> | InChI Key <sup>c</sup>        |
|---------------------|----------------------------------|----------------------------------------------------------------------------------------------------------------------|-----------------------------------|----------------------|----------------------|--------------------------|-------------------------------|
| 1-LG                | 1-linoleoylglycerol              | 2,3-dihydroxypropyl (9Z,12Z)-octadeca-9,12-dienoate                                                                  | Monoacylglycerol                  | C18:2n6              | HMDB11568            | 6436630                  | WECGLUPZRHLC-T-GSNKCQISSA-N   |
| 2-LG                | 2-linoleoylglycerol              | 1,3-dihydroxypropan-2-yl (9Z,12Z)-octadeca-9,12-dienoate                                                             | Monoacylglycerol                  | C18:2n6              | HMDB11538            | 5365676                  | IEPGLNWPFDNSD-HZJYTRNSA-N     |
| 1-AG                | 1-arachidonoylglycerol           | 2,3-dihydroxypropyl (5Z,8Z,11Z,14Z)-icosa-5,8,11,14-tetraenoate                                                      | Monoacylglycerol                  | C20:4n6              | HMDB11578            | 16019980                 | DCPCOKIYJYGMND-HUDVFFLJSA-N   |
| 2-AG                | 2-arachidonoylglycerol           | 1,3-dihydroxypropan-2-yl (5Z,8Z,11Z,14Z)-icosa-5,8,11,14-tetraenoate                                                 | Monoacylglycerol                  | C20:4n6              | HMDB04666            | 5282280                  | RCRCTLBHCHWDZ-DOFZRALJSA-N    |
| PGE2 1G             | Prostaglandin E2 1-glycerol      | [(2R)-2,3-dihydroxypropyl] (Z)-7-[[1R,2R,3S)-3-hydroxy-2-[(E,3S)-3-hydroxyoct-1-enyl]-5-oxocyclopentyl]hept-5-enoate | Monoacylglycerol                  | C20:4n6              | HMDB13043            | 52193688                 | RJXVYMSQBVEHN-SDTVLRMPSA-N    |
| PGF2a 1G            | Prostaglandin F2alpha 1-glycerol | 2,3-dihydroxypropyl (Z)-7-[[1R,2R,3R,5S)-3,5-dihydroxy-2-[(E,3S)-3-hydroxyoct-1-enyl]cyclopentyl]hept-5-enoate       | Monoacylglycerol                  | C20:4n6              | -                    | 24778485                 | NWKPOVHSHWJQNI-OMVDPNNKSA-N   |
| NO-Gly              | N-oleoylglycine                  | 2-[[[Z]-octadec-9-enoyl]amino]acetic acid                                                                            | Acylglycine                       | C18:1n9              | HMDB13631            | 6436908                  | HPFXACZRFJURI-KTKRTIGZSA-N    |
| NA-Gly              | N-arachidonoylglycine            | 2-[[[(5Z,8Z,11Z,14Z)-icosa-5,8,11,14-tetraenoyl]amino]acetic acid                                                    | Acylglycine                       | C20:4n6              | HMDB05096            | 5283389                  | YLEARPUNMCCMKP-DOFZRALJSA-N   |
| C18 dihydroceramide | Ceramide (d18:0/18:0)            | N-[(2S,3R)-1,3-dihydroxyoctadecan-2-yl]octadecanamide                                                                | Sphingolipid - [NdS] Ceramide     |                      | HMDB11761            | 5283573                  | KZTJQXAAJNHSC-0IDHKYIRSA-N    |
| C24 dihydroceramide | Ceramide (d18:0/24:0)            | N-[(2S,3R)-1,3-dihydroxyoctadecan-2-yl]tetracosanamide                                                               | Sphingolipid - [NdS] Ceramide     |                      | HMDB11768            | 5283577                  | BPLYVSYSBPLDOA-WVLEFPFSA-N    |
| C14 Ceramide        | Ceramide (d18:1/14:0)            | N-[(E,2S,3R)-1,3-dihydroxyoctadec-4-en-2-yl]tetradecanamide                                                          | Sphingolipid - [NS] Ceramide      |                      | HMDB11773            | 5282310                  | ZKRPZPHULJLJ-KJHRQACZSA-N     |
| C16 Ceramide        | Ceramide (d18:1/16:0)            | N-[(E,2S,3R)-1,3-dihydroxyoctadec-4-en-2-yl]hexadecanamide                                                           | Sphingolipid - [NS] Ceramide      |                      | HMDB04949            | 5283564                  | YDNKGFDKKRPY-TURZORIXSA-N     |
| C18 Ceramide        | Ceramide (d18:1/18:0)            | N-[(E,2S,3R)-1,3-dihydroxyoctadec-4-en-2-yl]octadecanamide                                                           | Sphingolipid - [NS] Ceramide      |                      | HMDB04950            | 5283565                  | VODZWWWEJITOND-NXCSZAMKSA-N   |
| C18:1 Ceramide      | Ceramide (d18:1/18:1)            | (Z)-N-[(E,2S,3R)-1,3-dihydroxyoctadec-4-en-2-yl]octadec-9-enamide                                                    | Sphingolipid - [NS] Ceramide      |                      | HMDB04948            | 5283563                  | OBFSMLQPNKVRW-RHPAUIOSSA-N    |
| C20 Ceramide        | Ceramide (d18:1/20:0)            | N-[(E,2S,3R)-1,3-dihydroxyoctadec-4-en-2-yl]icosanamide                                                              | Sphingolipid - [NS] Ceramide      |                      | HMDB04951            | 5283566                  | XWBWIAOWSABHI-NUKVNZTCSA-N    |
| C24 Ceramide        | Ceramide (d18:1/24:0)            | N-[(E,2S,3R)-1,3-dihydroxyoctadec-4-en-2-yl]tetracosanamide                                                          | Sphingolipid - [NS] Ceramide      |                      | HMDB04956            | 5283571                  | ZJVOYPTFQEGPH-AUTSKAISA-N     |
|                     | 18:0 Sphinganine-1P              | [(2S,3R)-2-amino-3-hydroxyoctadecyl] dihydrogen phosphate                                                            | Sphingolipid - Sphingosine        |                      | HMDB01383            | 644260                   | YHEDRPUIMZMP-ZWKTCPCHSA-N     |
|                     | 18:1 Sphingosine                 | (E)-2-aminooctadec-4-ene-1,3-diol                                                                                    | Sphingolipid - Sphingosine        |                      | HMDB00252            | 5353955                  | WVUZIQQVGRGMPG-CCEZHUSRSA-N   |
|                     | 18:1 Sphingosine-1P              | [(E)-2-amino-3-hydroxyoctadec-4-enyl] dihydrogen phosphate                                                           | Sphingolipid - Sphingosine        |                      | HMDB00277            | 5353956                  | DUYSYHSSBDVSM-CCEZHUSRSA-N    |
| C12:0               | Lauric Acid                      | Dodecanoic Acid                                                                                                      | Saturated Fatty Acid (SFA)        |                      | HMDB00638            | 3893                     | POULHZVOKOAJMA-UHFFFAOYSA-N   |
| C14:0               | Myristic Acid                    | Tetradecanoic Acid                                                                                                   | Saturated Fatty Acid (SFA)        |                      | HMDB00806            | 11005                    | TUNFSRHWOTWDNC-UHFFFAOYSA-N   |
| C15:0               |                                  | Pentadecanoic Acid                                                                                                   | Saturated Fatty Acid (SFA)        |                      | HMDB00826            | 13849                    | WQEPJLUJUGTLDZJY-UHFFFAOYSA-N |
| C16:0               | Palmitic Acid                    | Hexadecanoic Acid                                                                                                    | Saturated Fatty Acid (SFA)        |                      | HMDB00220            | 985                      | IPCSVZSSVZVIGE-UHFFFAOYSA-N   |
| C17:0               | Margaric Acid                    | Heptadecanoic Acid                                                                                                   | Saturated Fatty Acid (SFA)        |                      | HMDB02259            | 10465                    | KEMQGTRYUADPNZ-UHFFFAOYSA-N   |
| C18:0               | Stearic Acid                     | Octadecanoic Acid                                                                                                    | Saturated Fatty Acid (SFA)        |                      | HMDB00827            | 5281                     | QIQXTHQIDYTFRH-UHFFFAOYSA-N   |
| C20:0               | Arachidic Acid                   | Icosanoic Acid                                                                                                       | Saturated Fatty Acid (SFA)        |                      | HMDB02212            | 10467                    | VKOBVWKNCXDE-UHFFFAOYSA-N     |
| C22:0               | Behenic Acid                     | Docosanoic Acid                                                                                                      | Saturated Fatty Acid (SFA)        |                      | HMDB00944            | 8215                     | UKMSUNONTOPIO-UHFFFAOYSA-N    |
| C24:0               | Lignoceric Acid                  | Tetracosanoic Acid                                                                                                   | Saturated Fatty Acid (SFA)        |                      | HMDB02003            | 11197                    | QZZGJVVWLFEXDLK-UHFFFAOYSA-N  |
| C16:1n7t            | Palmitelaidic Acid               | (E)-hexadec-9-enoic acid                                                                                             | Monounsaturated Fatty Acid (MUFA) |                      | HMDB12328            | 5282745                  | SECPZKHBNQXJG-BQYQJAHWSA-N    |
| C16:1n7             | Palmitoleic Acid                 | (Z)-hexadec-9-enoic acid                                                                                             | Monounsaturated Fatty Acid (MUFA) |                      | HMDB03229            | 445638                   | SECPZKHBNQXJG-FPLPWBNLISA-N   |
| C18:1n9             | Oleic Acid                       | (Z)-octadec-9-enoic acid                                                                                             | Monounsaturated Fatty Acid (MUFA) |                      | HMDB00207            | 445639                   | ZQPPMHVWECISIRJ-KTKRTIGZSA-N  |
| C18:1n7             | Vaccenic Acid                    | (Z)-octadec-11-enoic acid                                                                                            | Monounsaturated Fatty Acid (MUFA) |                      | HMDB03231            | 5282761                  | UWHZIFQPPBDJPM-FPLPWBNLISA-N  |
| C19:1n9             | 10-Nonadecenoic acid             | (Z)-nonadec-10-enoic acid                                                                                            | Monounsaturated Fatty Acid (MUFA) |                      | HMDB13622            | 5312513                  | BBOWBNGUEWHNQZ-KTKRTIGZSA-N   |

<sup>a</sup> Compound identification number for the Human Metabolome Database (<http://www.hmdb.ca/>). Analytes not listed in the Human Metabolome Database are designated with "-"

<sup>b</sup> Compound identification number for the National Center for Biotechnology Information's PubChem database (<https://pubchem.ncbi.nlm.nih.gov/>)

<sup>c</sup> IUPAC International Chemical Identifier

<sup>d</sup> This analyte represents the sum of the peaks of all observed isomers of the linoleate-derived triols. Concentrations are calculated relative to concentrations of authentic 9,12,13-TriHOME standards, the nomenclature of which is shown here

Supplemental Table S3

Supplemental Table S3. List of lipid mediator and fatty acid analytes with common database identifiers.

| Common Abbreviation | Common Name                                   | IUPAC Name                                                    | Analyte Class                        | Fatty Acid Precursor | HMDB ID <sup>a</sup> | PubChem CID <sup>b</sup> | InChI Key <sup>c</sup>       |
|---------------------|-----------------------------------------------|---------------------------------------------------------------|--------------------------------------|----------------------|----------------------|--------------------------|------------------------------|
| C20:1n9             | 11-Eicosenoic acid                            | (Z)-icos-11-enoic acid                                        | Monounsaturated Fatty Acid (MUFA)    |                      | HMDB02231            | 5282768                  | BITHHVYYSMSWAG-KTKRTIGZSA-N  |
| C18:2n6             | Linoleic Acid                                 | (9Z,12Z)-octadeca-9,12-dienoic acid                           | Polyunsaturated Fatty Acid (PUFA)    |                      | HMDB00673            | 5280450                  | OYHQLOLJKZRVRURQ-HZJYTRNSA-N |
| C18:3n6             | gamma-Linolenic acid                          | (6Z,9Z,12Z)-octadeca-6,9,12-trienoic acid                     | Polyunsaturated Fatty Acid (PUFA)    |                      | HMDB03073            | 5280933                  | VZCCEWTMTMQHEPK-QNEBEHSSA-N  |
| C18:2(9c,11t)-CLA   | Bovinic Acid                                  | (9Z,11E)-octadeca-9,11-dienoic acid                           | Polyunsaturated Fatty Acid (PUFA)    |                      | HMDB03797            | 5280644                  | JBYXPOFIGCOSSB-GOJKSUSPSA-N  |
| C18:3n3             | alpha-Linolenic Acid                          | (9Z,12Z,15Z)-octadeca-9,12,15-trienoic acid                   | Polyunsaturated Fatty Acid (PUFA)    |                      | HMDB01388            | 5280934                  | DTOSIQBPPRVQHS-PDBXOOCHSA-N  |
| C20:2n6             | Dihomo-Linoleic Acid                          | (11Z,14Z)-icos-11,14-dienoate                                 | Polyunsaturated Fatty Acid (PUFA)    |                      | -                    | 40846588                 | XSXIVVZCUAHUJO-HZJYTRNSA-M   |
| C20:3n6             | Dihomo-gamma-Linolenic Acid                   | (8Z,11Z,14Z)-icos-8,11,14-trienoic acid                       | Polyunsaturated Fatty Acid (PUFA)    |                      | HMDB02925            | 5280581                  | HOBALERKJCKHQD-QNEBEHSSA-N   |
| C20:3n9             | Mead Acid                                     | (5Z,8Z,11Z)-icos-5,8,11-trienoic acid                         | Polyunsaturated Fatty Acid (PUFA)    |                      | HMDB10378            | 5312531                  | UNSRHRDHPVZAHH-YOILPLPUSA-N  |
| C20:4n6             | Arachidonic Acid                              | (5Z,8Z,11Z,14Z)-icos-5,8,11,14-tetraenoic acid                | Highly Unsaturated Fatty Acid (HUFA) |                      | HMDB01043            | 444899                   | YZXBAPSDXZZRQB-DOFZRALJSA-N  |
| C22:4n6             | Adrenic Acid                                  | (7Z,10Z,13Z,16Z)-docosa-7,10,13,16-tetraenoic acid            | Highly Unsaturated Fatty Acid (HUFA) |                      | HMDB02226            | 5497181                  | TWSWSIQAPQLDBP-DOFZRALJSA-N  |
| C22:5n6             | Osbond Acid (Docosapentaenoic Acid)           | (4Z,7Z,10Z,13Z,16Z)-docosa-4,7,10,13,16-pentaenoic acid       | Highly Unsaturated Fatty Acid (HUFA) |                      | -                    | 6441454                  | AVKOENOBFIYBSA-WMPRHZDHSAN   |
| C18:4n3             | Stearidonic Acid (Morocitic Acid)             | (6Z,9Z,12Z,15Z)-octadeca-6,9,12,15-tetraenoic acid            | Highly Unsaturated Fatty Acid (HUFA) |                      | HMDB06547            | 5312508                  | JJWBWFOCKQMA-LTKCOYKYSA-N    |
| C20:4n3             |                                               | (4Z,7Z,10Z,13Z)-eicosatetraenoic acid                         | Highly Unsaturated Fatty Acid (HUFA) |                      | -                    | -                        | -                            |
| C20:5n3             | Timnodonic Acid (Eicosapentaenoic Acid, EPA)  | (5Z,8Z,11Z,14Z,17Z)-icos-5,8,11,14,17-pentaenoic acid         | Highly Unsaturated Fatty Acid (HUFA) |                      | HMDB01999            | 446284                   | JAZBEHYOTPTENJ-JLNKQSITSA-N  |
| C22:5n3             | Clupanodonic Acid (Docosapentaenoic Acid, DP) | (7Z,10Z,13Z,16Z,19Z)-docosa-7,10,13,16,19-pentaenoic acid     | Highly Unsaturated Fatty Acid (HUFA) |                      | HMDB06528            | 5497182                  | YUFFSWGQGVEMMI-JLNKQSITSA-N  |
| C22:6n3             | Cervonic Acid (Docosahexaenoic Acid, DHA)     | (4Z,7Z,10Z,13Z,16Z,19Z)-docosa-4,7,10,13,16,19-hexaenoic acid | Highly Unsaturated Fatty Acid (HUFA) |                      | HMDB02183            | 445580                   | MBMBGCFQFBJSGT-KUBAVDMBSA-N  |

<sup>a</sup> Compound identification number for the Human Metabolome Database (<http://www.hmdb.ca/>). Analytes not listed in the Human Metabolome Database are designated with "-"

<sup>b</sup> Compound identification number for the National Center for Biotechnology Information's PubChem database (<https://pubchem.ncbi.nlm.nih.gov/>)

<sup>c</sup> IUPAC International Chemical Identifier

<sup>d</sup> This analyte represents the sum of the peaks of all observed isomers of the linoleate-derived triols. Concentrations are calculated relative to concentrations of authentic 9,12,13-TriHOME standards, the nomenclature of which is shown here

Supplemental Table S4. Effects of atopic dermatitis and gender on detected sebum lipid mediators and fatty acids.

| Cluster <sup>a</sup> | Metabolite         | Unit      | Concentration in Blank Sebutapes | Blank-Corrected Concentration in Samples <sup>b</sup> |                              |                              |                              | <i>P</i> ( <i>P</i> <sub>adj</sub> ) <sup>c</sup> |             |                |
|----------------------|--------------------|-----------|----------------------------------|-------------------------------------------------------|------------------------------|------------------------------|------------------------------|---------------------------------------------------|-------------|----------------|
|                      |                    |           |                                  | Control Female (n = 4)                                | AD Female (n = 5)            | Control Male (n = 5)         | AD Male (n = 6)              | Disease                                           | Gender      | Disease*Gender |
| 1                    | 9-HETE             | pmol/tape | 0.009                            | 0.0103 [0.00414 - 0.0259]                             | 0.0161 [0.00324 - 0.0308]    | 0.0203 [0.00494 - 0.0344]    | 0.0397 [0.0176 - 0.0746]     | 0.7 (0.9)                                         | 0.1 (0.3)   | 0.9 (0.9)      |
|                      | PGE1               | pmol/tape | 0.002                            | 0.00199 [0.00138 - 0.00356]                           | 0.00174 [0.00028 - 0.00705]  | 0.00676 [0.00122 - 0.019]    | 0.00202 [0.00043 - 0.0096]   |                                                   |             |                |
| 2                    | 15-KETE            | pmol/tape | 0.084                            | 0.319 [0.264 - 0.381]                                 | 0.254 [0.116 - 0.507]        | 0.41 [0.0409 - 2.06]         | 0.493 [0.178 - 0.686]        | 0.4 (0.7)                                         | 0.02 (0.16) | 0.4 (0.9)      |
|                      | 8,9-EpETrE         | pmol/tape | ND                               | 0.675 [0.101 - 3.24]                                  | 1.03 [0.79 - 1.31]           | 2.79 [0.379 - 34.5]          | 3.65 [1.01 - 10.5]           |                                                   |             |                |
| 3                    | 15-HEPE            | pmol/tape | 0.007                            | 0.0104 [0.00487 - 0.0212]                             | 0.0146 [0.00667 - 0.0194]    | 0.0367 [0.00837 - 0.134]     | 0.0186 [0.0133 - 0.03]       | 0.9 (1)                                           | 0.01 (0.11) | 0.2 (0.8)      |
|                      | 15-HETE            | pmol/tape | 0.01                             | 0.185 [0.122 - 0.284]                                 | 0.107 [0.0324 - 0.406]       | 0.797 [0.181 - 3.25]         | 0.489 [0.309 - 0.73]         |                                                   |             |                |
|                      | TFA - C18:3n3      | μmol/tape | 1.212                            | 0.616 [0.337 - 1.26]                                  | 1.16 [0.35 - 1.96]           | 1.55 [0.946 - 4.38]          | 0.75 [0.325 - 1.37]          |                                                   |             |                |
| 4                    | 11-HETE            | pmol/tape | 0.005                            | 0.011 [0.00544 - 0.0146]                              | 0.00708 [0.00198 - 0.0276]   | 0.0291 [0.00734 - 0.137]     | 0.0186 [0.0005 - 0.0709]     | 0.5 (0.9)                                         | 0.01 (0.11) | 0.8 (0.9)      |
|                      | 12-HEPE            | pmol/tape | 0.003                            | 0.00318 [0.00147 - 0.00901]                           | 0.00313 [0.0003 - 0.0182]    | 0.0163 [0.00696 - 0.0337]    | 0.0118 [0.00487 - 0.0607]    |                                                   |             |                |
|                      | 12-HETE            | pmol/tape | 0.002                            | 0.0835 [0.0339 - 0.323]                               | 0.153 [0.0462 - 0.456]       | 0.354 [0.0772 - 2.25]        | 0.469 [0.0662 - 1.76]        |                                                   |             |                |
|                      | 13-KODE            | pmol/tape | 11.5                             | 6.97 [4.29 - 17.2]                                    | 1.48 [0.1 - 3.82]            | 3.56 [1.3 - 25.5]            | 7.31 [4.4 - 12.4]            |                                                   |             |                |
|                      | 14-HDoHE           | pmol/tape | ND                               | 0.0225 [0.0043 - 0.0566]                              | 0.0202 [0.00374 - 0.0583]    | 0.1 [0.0497 - 0.395]         | 0.0647 [0.00717 - 0.29]      |                                                   |             |                |
|                      | 17-HDoHE           | pmol/tape | ND                               | 0.0639 [0.0469 - 0.112]                               | 0.105 [0.0446 - 0.147]       | 0.292 [0.0473 - 0.903]       | 0.165 [0.0941 - 0.399]       |                                                   |             |                |
|                      | 5-HETE             | pmol/tape | 0.011                            | 0.0852 [0.0516 - 0.134]                               | 0.0236 [0.007 - 0.0689]      | 0.079 [0.0303 - 0.424]       | 0.0312 [0.0078 - 0.0714]     |                                                   |             |                |
|                      | 8-HETE             | pmol/tape | 0.007                            | 0.00499 [0.0011 - 0.0119]                             | 0.0143 [0.00122 - 0.059]     | 0.0292 [0.0037 - 0.272]      | 0.0556 [0.0308 - 0.178]      |                                                   |             |                |
|                      | C16 Ceramide       | pmol/tape | 0.4                              | 13 [9.57 - 15.9]                                      | 5.79 [2.65 - 11.7]           | 16.9 [10.3 - 25.5]           | 15.1 [8.19 - 25.8]           |                                                   |             |                |
| 5                    | 17,18-DIHETE       | pmol/tape | 0.12                             | 0.09 [0.045 - 0.311]                                  | 0.205 [0.109 - 0.3]          | 0.155 [0.124 - 0.189]        | 0.121 [0.008 - 0.372]        | 0.2 (0.7)                                         | 0.8 (0.9)   | 0.5 (0.9)      |
| 6                    | 10-Nitrolinoleate  | pmol/tape | 0.088                            | 0.0598 [0.0199 - 0.165]                               | 0.0545 [0.0209 - 0.209]      | 0.101 [0.0669 - 0.15]        | 0.0474 [0.0021 - 0.199]      | 0.8 (1)                                           | 0.8 (0.9)   | 0.6 (0.9)      |
| 7                    | 18:1 Sphingosine   | pmol/tape | 2.6                              | 14 [11.3 - 16.4]                                      | 15.7 [10.5 - 21.4]           | 15.1 [11.9 - 18.7]           | 14.5 [9.37 - 23.6]           | 1 (1)                                             | 0.8 (0.9)   | 0.4 (0.9)      |
|                      | 20-HETE            | pmol/tape | 0.122                            | 0.195 [0.078 - 0.501]                                 | 0.24 [0.081 - 0.506]         | 0.241 [0.098 - 0.403]        | 0.169 [0.076 - 0.285]        |                                                   |             |                |
| 8                    | LEA                | pmol/tape | 2.19                             | 1.42 [0.07 - 6.51]                                    | 1.95 [0.16 - 15.5]           | 2.53 [0.27 - 8.21]           | 0.991 [0.27 - 5.34]          | 0.6 (0.9)                                         | 0.8 (0.9)   | 0.2 (0.8)      |
|                      | OEA                | pmol/tape | 1                                | 2.76 [0.549 - 28.6]                                   | 2.92 [0.499 - 61.1]          | 9.68 [1.35 - 42]             | 4.45 [0.959 - 22.1]          |                                                   |             |                |
|                      | PEA                | pmol/tape | 18.4                             | 34.2 [16.3 - 82.6]                                    | 48 [28.5 - 160]              | 59.5 [22.8 - 149]            | 16.8 [4.6 - 79.1]            |                                                   |             |                |
|                      | SEA                | pmol/tape | 19.8                             | 25.2 [8.5 - 49.1]                                     | 35.5 [20.5 - 74.1]           | 34.5 [20.4 - 60]             | 19.4 [3.47 - 35.6]           |                                                   |             |                |
| 9                    | 11,12-EpETrE       | pmol/tape | 0.008                            | 0.0105 [0.00375 - 0.0199]                             | 0.00635 [0.00132 - 0.0221]   | 0.00397 [0.00035 - 0.0202]   | 0.00353 [0.00137 - 0.00875]  | 0.7 (0.9)                                         | 0.6 (0.9)   | 0.9 (1)        |
|                      | PGE3               | pmol/tape | ND                               | 0.0134 [0.00653 - 0.0271]                             | 0.0145 [0.00819 - 0.0201]    | 0.0163 [0.00873 - 0.025]     | 0.016 [0.0125 - 0.0211]      |                                                   |             |                |
| 10                   | 1-AG               | pmol/tape | 0.256                            | 0.327 [0.175 - 0.68]                                  | 0.357 [0.041 - 2.27]         | 0.821 [0.256 - 3.68]         | 0.642 [0.161 - 1.72]         | 0.7 (0.9)                                         | 0.5 (0.8)   | 0.3 (0.9)      |
|                      | 1-LG               | pmol/tape | 127                              | 116 [73 - 194]                                        | 143 [23 - 322]               | 170 [44 - 443]               | 96.4 [26 - 196]              |                                                   |             |                |
| 11                   | TFA - C22:5n6      | μmol/tape | 0.236                            | 1.56 [0.347 - 5.36]                                   | 1.09 [0.166 - 5.03]          | 1.64 [0.896 - 5.13]          | 0.591 [0.29 - 2.99]          | 0.3 (0.7)                                         | 0.9 (0.9)   | 0.5 (0.9)      |
| 12                   | 5,6-DIHETrE        | pmol/tape | 0.001                            | 0.00116 [0.000539 - 0.00333]                          | 0.00157 [0.000499 - 0.00664] | 0.00121 [0.000192 - 0.00584] | 0.00157 [0.000669 - 0.00316] | 0.9 (1)                                           | 0.8 (0.9)   | 0.03 (0.5)     |
|                      | 8,9-DIHETrE        | pmol/tape | 5.68                             | 1.17 [0.59 - 1.95]                                    | 2.32 [0.76 - 5.62]           | 2.1 [0.47 - 5.52]            | 1.71 [0.48 - 6.22]           |                                                   |             |                |
|                      | 9,10-e-DIHO        | pmol/tape | 0.55                             | 1.61 [1.18 - 1.98]                                    | 1.74 [1.24 - 2.39]           | 1.99 [1.51 - 3.54]           | 1.42 [0.976 - 2.14]          |                                                   |             |                |
|                      | NEFA - 10t,12c-CLA | μmol/tape | 0.045                            | 0.0171 [0.011 - 0.024]                                | 0.0447 [0.024 - 0.107]       | 0.0622 [0.032 - 0.204]       | 0.0258 [0.006 - 0.341]       |                                                   |             |                |
|                      | TFA - 10t,12c-CLA  | μmol/tape | 0.051                            | 0.0266 [0.006 - 0.099]                                | 0.0878 [0.0608 - 0.136]      | 0.0867 [0.0153 - 0.233]      | 0.0438 [0.014 - 0.101]       |                                                   |             |                |
| 13                   | 12,13-EpODE        | pmol/tape | 0.175                            | 0.0465 [0.02 - 0.136]                                 | 0.241 [0.129 - 0.845]        | 0.109 [0.046 - 0.306]        | 0.0471 [0.008 - 0.145]       | 0.2 (0.7)                                         | 0.7 (0.9)   | 0.03 (0.5)     |
|                      | 12,13-DIHOME       | pmol/tape | 0.66                             | 0.457 [0.3 - 0.69]                                    | 0.799 [0.41 - 2.64]          | 0.585 [0.109 - 3.7]          | 0.468 [0.246 - 0.83]         |                                                   |             |                |
|                      | NEFA - C18:3n3     | μmol/tape | 0.607                            | 0.381 [0.243 - 0.455]                                 | 0.592 [0.349 - 1.91]         | 0.576 [0.34 - 0.785]         | 0.543 [0.314 - 1.07]         |                                                   |             |                |

<sup>a</sup> Analytes were subjected to hierarchical cluster analysis using the method of Ward (1965)

<sup>b</sup> Data reported as Geometric Mean [Range]

<sup>c</sup> The reported p-values are also adjusted for multiple comparisons by the Benjamini-Hochberg procedure at q = 0.2

<sup>d</sup> This analyte represents the sum of the peaks of all observed isomers of the linoleate-derived triols. Concentrations were calculated relative to concentrations of authentic 9,12,13-TriHOME standards

<sup>e</sup> Analyte quantified using the response of the coeluting C16:1n7t standards

<sup>f</sup> Analyte quantified using the response of the coeluting C18:1n9 standards

Supplemental Table S4. Effects of atopic dermatitis and gender on detected sebum lipid mediators and fatty acids.

| Cluster <sup>a</sup> | Metabolite                | Unit               | Concentration in Blank Sebutapes | Blank-Corrected Concentration in Samples <sup>b</sup> |                             |                            |                            | <i>P</i> ( <i>P</i> <sub>adj</sub> ) <sup>c</sup> |           |                |
|----------------------|---------------------------|--------------------|----------------------------------|-------------------------------------------------------|-----------------------------|----------------------------|----------------------------|---------------------------------------------------|-----------|----------------|
|                      |                           |                    |                                  | Control Female (n=4)                                  | AD Female (n=5)             | Control Male (n=5)         | AD Male (n=6)              | Disease                                           | Gender    | Disease*Gender |
| 14                   | 12,13-Ep-9-KODE           | pmol/tape          | 0.34                             | 2.34 [1.96 - 2.74]                                    | 2.85 [2.45 - 3.32]          | 2.57 [1.43 - 4.29]         | 2.83 [1.94 - 4.67]         | 0.9 (1)                                           | 0.8 (0.9) | 1 (1)          |
|                      | 12,13-DiHODE              | pmol/tape          | 0.064                            | 0.0527 [0.0427 - 0.0667]                              | 0.0549 [0.0209 - 0.4]       | 0.0433 [0.0264 - 0.125]    | 0.0358 [0.019 - 0.0827]    |                                                   |           |                |
|                      | 15,16-DiHODE              | pmol/tape          | 0.321                            | 0.11 [0.091 - 0.15]                                   | 0.135 [0.008 - 7.41]        | 0.137 [0.082 - 0.365]      | 0.0952 [0.015 - 0.759]     |                                                   |           |                |
|                      | 2-AG                      | pmol/tape          | 0.34                             | 0.808 [0.218 - 2.24]                                  | 0.901 [0.22 - 2.78]         | 2.04 [0.779 - 10.8]        | 1.42 [0.54 - 4.93]         |                                                   |           |                |
|                      | 9,10-DiHODE               | pmol/tape          | 0.075                            | 0.0394 [0.0317 - 0.0527]                              | 0.0727 [0.0164 - 2.65]      | 0.0319 [0.0191 - 0.0627]   | 0.0292 [0.0137 - 0.0637]   |                                                   |           |                |
| 15                   | 9,10-EpOME                | pmol/tape          | 1.34                             | 1.03 [0.32 - 3.26]                                    | 7.74 [4.1 - 21]             | 1.01 [0.29 - 4.43]         | 0.999 [0.15 - 2.79]        | 0.1 (0.3)                                         | 0.1 (0.3) | 0.1 (0.7)      |
| 16                   | NEFA - C20:4n3            | μmol/tape          | 0.239                            | 0.306 [0.205 - 0.503]                                 | 0.406 [0.331 - 0.486]       | 0.339 [0.217 - 0.617]      | 0.368 [0.188 - 0.645]      | 0.2 (0.7)                                         | 0.6 (0.9) | 0.4 (0.9)      |
|                      | NEFA - C20:5n3            | μmol/tape          | 0.002                            | 0.349 [0.228 - 0.419]                                 | 0.48 [0.384 - 0.557]        | 0.36 [0.204 - 0.705]       | 0.355 [0.247 - 0.992]      |                                                   |           |                |
| 17                   | TFA - C20:2n6             | μmol/tape          | 0.064                            | 0.0492 [0.008 - 0.158]                                | 0.129 [0.055 - 0.21]        | 0.082 [0.0271 - 0.176]     | 0.0699 [0.016 - 0.151]     | 0.6 (0.9)                                         | 0.7 (0.9) | 0.1 (0.7)      |
|                      | TFA - C20:4n3             | μmol/tape          | 0.031                            | 0.333 [0.258 - 0.478]                                 | 0.37 [0.229 - 0.537]        | 0.486 [0.288 - 0.739]      | 0.368 [0.228 - 0.517]      |                                                   |           |                |
| 18                   | Sum TriHOMEs <sup>d</sup> | pmol/tape          | 1.6                              | 0.683 [0.23 - 2.79]                                   | 0.33 [0.1 - 1.07]           | 0.487 [0.07 - 4.65]        | 0.781 [0.16 - 4.05]        | 0.7 (0.9)                                         | 0.9 (0.9) | 0.5 (0.9)      |
|                      | TFA - C10:0               | μmol/tape          | 0.21                             | 6.98 [0.558 - 120]                                    | 1.87 [1.32 - 3.6]           | 2.22 [0.419 - 52.6]        | 3.1 [0.657 - 69.5]         |                                                   |           |                |
|                      | TFA - C18:0               | μmol/tape          | 21.473                           | 47.9 [29.4 - 65.4]                                    | 34.8 [18.9 - 51.6]          | 30.4 [11.7 - 89.2]         | 32.6 [17.2 - 69.1]         |                                                   |           |                |
|                      | TFA - C18:1n7             | μmol/tape          | 0.281                            | 2.12 [1.42 - 3.02]                                    | 1.86 [1.02 - 3.59]          | 2.82 [0.897 - 8.77]        | 1.63 [0.248 - 11.3]        |                                                   |           |                |
| 19                   | 9,10-EpO                  | pmol/tape          | 1.1                              | 10.9 [5.6 - 49.4]                                     | 7.94 [6.21 - 10.7]          | 7.96 [6.04 - 9.85]         | 8.68 [6.61 - 10.8]         | 0.4 (0.7)                                         | 0.2 (0.5) | 0.8 (0.9)      |
|                      | TFA - C18:3n6             | μmol/tape          | 0.013                            | 0.0661 [0.027 - 0.123]                                | 0.0957 [0.043 - 0.21]       | 0.121 [0.049 - 0.227]      | 0.134 [0.0527 - 0.408]     |                                                   |           |                |
| 20                   | 9-HEPE                    | pmol/tape          | 0.005                            | 0.00637 [0.00276 - 0.0138]                            | 0.00515 [0.00161 - 0.00935] | 0.00632 [0.00259 - 0.0134] | 0.00274 [0.00013 - 0.0144] | 0.5 (0.8)                                         | 0.7 (0.9) | 0.8 (0.9)      |
| 21                   | 5-KETE                    | pmol/tape          | 0.004                            | 0.00742 [0.00357 - 0.0147]                            | 0.00359 [0.00055 - 0.0116]  | 0.00785 [0.00417 - 0.0144] | 0.00344 [0.00092 - 0.008]  | 0.04 (0.3)                                        | 0.3 (0.7) | 0.4 (0.9)      |
|                      | TFA - C18:2n6             | μmol/tape          | 8.689                            | 16.7 [13.2 - 20.2]                                    | 15.7 [6.7 - 34.9]           | 22.1 [5.3 - 107]           | 9.27 [2.78 - 104]          |                                                   |           |                |
| 22                   | C18 Ceramide              | pmol/tape          | 0.608                            | 0.818 [0.351 - 1.3]                                   | 0.152 [0.007 - 0.662]       | 0.529 [0.372 - 0.982]      | 0.323 [0.136 - 0.732]      | 0 (0.12)                                          | 0.1 (0.3) | 0.3 (0.9)      |
|                      | C18 dihydroceramide       | pmol/tape          | ND                               | 2.65 [1.84 - 4.02]                                    | 1.59 [1.13 - 2.36]          | 1.93 [1.11 - 2.99]         | 1.53 [0.99 - 1.94]         |                                                   |           |                |
|                      | C18:1 Ceramide            | pmol/tape          | 0.1                              | 39.8 [32.6 - 61.4]                                    | 28.2 [18.8 - 36.2]          | 29.6 [24.9 - 33.2]         | 23.5 [17.3 - 30.6]         |                                                   |           |                |
| 23                   | C24 Ceramide              | pmol/tape          | 0.19                             | 6.93 [5.55 - 8.23]                                    | 6.04 [3.54 - 7.86]          | 2.8 [1.26 - 9.76]          | 3.11 [1.42 - 10.9]         | 0.9 (1)                                           | 0 (0.11)  | 0.6 (0.9)      |
|                      | C24 dihydroceramide       | pmol/tape          | ND                               | 6.53 [5.34 - 7.96]                                    | 5.41 [3.72 - 8.5]           | 1.7 [0.89 - 6.11]          | 2.04 [1.06 - 4.03]         |                                                   |           |                |
| 24                   | C20 Ceramide              | pmol/tape          | 1.84                             | 2.34 [0.7 - 8.14]                                     | 2.05 [0.43 - 3.97]          | 2.33 [1.36 - 3.12]         | 1.27 [0.91 - 1.65]         | 0.02 (0.3)                                        | 0.7 (0.9) | 0.7 (0.9)      |
|                      | TFA - C12:0               | μmol/tape          | 0.923                            | 30.1 [12.8 - 129]                                     | 11.1 [5.89 - 23.2]          | 19.1 [5.99 - 83.9]         | 13.6 [2.92 - 113]          |                                                   |           |                |
|                      | TFA - C22:2n6             | μmol/tape          | 0.124                            | 1.94 [1.31 - 3.22]                                    | 0.84 [0.343 - 1.25]         | 2.62 [1.16 - 8.07]         | 1 [0.159 - 1.78]           |                                                   |           |                |
| 25                   | 1-OG                      | pmol/tape          | 68                               | 270 [122 - 421]                                       | 96 [58.8 - 166]             | 615 [175 - 1770]           | 202 [44.8 - 539]           | 0.04 (0.3)                                        | 0.1 (0.3) | 0.9 (1)        |
|                      | 5-HEPE                    | pmol/tape          | 0.012                            | 0.0227 [0.007 - 0.0502]                               | 0.0044 [0.0001 - 0.0319]    | 0.0239 [0.0055 - 0.0872]   | 0.00901 [0.00073 - 0.0434] |                                                   |           |                |
|                      | 9,10-DiHOME               | pmol/tape          | 0.66                             | 0.852 [0.716 - 0.936]                                 | 1.39 [0.816 - 6.54]         | 0.942 [0.506 - 1.81]       | 0.91 [0.726 - 1.24]        |                                                   |           |                |
|                      | NEFA - 9c,11t-CLA         | μmol/tape          | 0.083                            | 0.0631 [0.027 - 0.132]                                | 0.0466 [0.013 - 0.102]      | 0.295 [0.14 - 0.738]       | 0.0625 [0.008 - 0.486]     |                                                   |           |                |
|                      | NEFA - C18:1n7            | μmol/tape          | 0.19                             | 0.347 [0.207 - 0.516]                                 | 0.178 [0.013 - 1.53]        | 0.864 [0.334 - 3.95]       | 0.915 [0.346 - 2.39]       |                                                   |           |                |
|                      | Sebumeter Reading         | μg/cm <sup>2</sup> |                                  | 0.0783 [0.047 - 0.111]                                | 0.0274 [0.012 - 0.148]      | 0.076 [0.013 - 0.199]      | 0.0694 [0.029 - 0.133]     |                                                   |           |                |
|                      | TFA - C20:1n9             | μmol/tape          | 0.123                            | 5.25 [4.62 - 5.99]                                    | 2.19 [0.713 - 3.8]          | 7.37 [3.24 - 23.6]         | 4.07 [0.523 - 11.2]        |                                                   |           |                |
|                      | TFA - C20:4n6             | μmol/tape          | 0.264                            | 0.163 [0.0432 - 0.377]                                | 0.236 [0.164 - 0.415]       | 0.358 [0.074 - 1.05]       | 0.125 [0.038 - 0.282]      |                                                   |           |                |

<sup>a</sup> Analytes were subjected to hierarchical cluster analysis using the method of Ward (1965)

<sup>b</sup> Data reported as Geometric Mean [Range]

<sup>c</sup> The reported p-values are also adjusted for multiple comparisons by the Benjamini-Hochberg procedure at q = 0.2

<sup>d</sup> This analyte represents the sum of the peaks of all observed isomers of the linoleate-derived triols. Concentrations were calculated relative to concentrations of authentic 9,12,13-TriHOME standards

<sup>e</sup> Analyte quantified using the response of the coeluting C16:1n7 standards

<sup>f</sup> Analyte quantified using the response of the coeluting C18:1n9 standards

Supplemental Table S4. Effects of atopic dermatitis and gender on detected sebum lipid mediators and fatty acids.

| Cluster <sup>a</sup> | Metabolite                   | Unit      | Concentration in Blank Sebutapes | Blank-Corrected Concentration in Samples <sup>b</sup> |                              |                           |                              | <i>P</i> ( <i>P</i> <sub>adj</sub> ) <sup>c</sup> |             |                |
|----------------------|------------------------------|-----------|----------------------------------|-------------------------------------------------------|------------------------------|---------------------------|------------------------------|---------------------------------------------------|-------------|----------------|
|                      |                              |           |                                  | Control Female (n = 4)                                | AD Female (n = 5)            | Control Male (n = 5)      | AD Male (n = 6)              | Disease                                           | Gender      | Disease*Gender |
| 26                   | 2-OG                         | pmol/tape | 11                               | 130 [38.2 - 221]                                      | 77.6 [21.6 - 152]            | 239 [46.5 - 769]          | 179 [81.2 - 268]             | 0.3 (0.7)                                         | 0.04 (0.19) | 0.8 (0.9)      |
|                      | NEFA - C19:0                 | μmol/tape | 0.115                            | 0.23 [0.079 - 0.595]                                  | 0.2 [0.113 - 0.332]          | 0.716 [0.244 - 1.76]      | 0.498 [0.067 - 4.09]         |                                                   |             |                |
|                      | NEFA - C20:0                 | μmol/tape | 0.368                            | 0.949 [0.611 - 1.52]                                  | 0.768 [0.448 - 1.08]         | 2.28 [0.873 - 5.62]       | 1.84 [0.537 - 14.7]          |                                                   |             |                |
|                      | NEFA - C21:0                 | μmol/tape | 0.088                            | 0.103 [0.069 - 0.214]                                 | 0.079 [0.05 - 0.12]          | 0.218 [0.083 - 0.641]     | 0.191 [0.063 - 1.32]         |                                                   |             |                |
|                      | NEFA - C22:0                 | μmol/tape | 0.307                            | 1.5 [1.02 - 1.8]                                      | 1.49 [1.28 - 1.92]           | 2.59 [1.38 - 5.32]        | 2.45 [1.09 - 13.5]           |                                                   |             |                |
|                      | NEFA - C24:0                 | μmol/tape | 0.301                            | 2.41 [1.27 - 3.76]                                    | 1.92 [0.917 - 3.13]          | 3.51 [0.702 - 11.2]       | 4.32 [1.34 - 29.1]           |                                                   |             |                |
| 27                   | NEFA - C14:0                 | μmol/tape | 1.024                            | 10.1 [4.14 - 24.3]                                    | 7.35 [2.34 - 20.6]           | 30.8 [9.48 - 90]          | 17.9 [2.65 - 62.8]           | 0.3 (0.7)                                         | 0.02 (0.16) | 0.8 (0.9)      |
|                      | NEFA - C15:0                 | μmol/tape | 0.343                            | 8.37 [5.33 - 20.8]                                    | 4.42 [1.33 - 11.2]           | 20.9 [4.19 - 68.5]        | 15.1 [2.57 - 58]             |                                                   |             |                |
|                      | NEFA - C16:0                 | μmol/tape | 12.717                           | 37.3 [23.8 - 76.9]                                    | 28 [10.4 - 44.5]             | 106 [34.1 - 290]          | 57.6 [10.7 - 218]            |                                                   |             |                |
|                      | NEFA - C16:1n10 <sup>e</sup> | μmol/tape | 0.443                            | 28.7 [16.3 - 72]                                      | 12.5 [3.52 - 46.5]           | 84.8 [14.7 - 318]         | 41.7 [4.88 - 273]            |                                                   |             |                |
|                      | NEFA - C17:0                 | μmol/tape | 0.385                            | 1.88 [0.978 - 4.92]                                   | 1.28 [0.503 - 2.23]          | 5.52 [1.76 - 16.4]        | 3.68 [0.75 - 19]             |                                                   |             |                |
|                      | NEFA - C18:0                 | μmol/tape | 18.828                           | 8.76 [3.36 - 13.4]                                    | 10.5 [5.92 - 16.7]           | 23.5 [15.2 - 42.3]        | 15.1 [5.13 - 58.6]           |                                                   |             |                |
|                      | NEFA - C18:1n12 <sup>f</sup> | μmol/tape | 3.424                            | 19.8 [9.18 - 44.4]                                    | 17.5 [6.43 - 47.8]           | 59 [19.7 - 203]           | 36 [5.6 - 193]               |                                                   |             |                |
|                      | NEFA - C20:1n9               | μmol/tape | 0.84                             | 0.524 [0.146 - 1.43]                                  | 0.487 [0.175 - 1.5]          | 3.17 [1.16 - 14.4]        | 1.44 [0.2 - 11.3]            |                                                   |             |                |
|                      | NEFA - Total Fatty Acids     | μmol/tape |                                  | 127 [74.8 - 270]                                      | 96.4 [38.7 - 163]            | 365 [113 - 1070]          | 211 [40 - 968]               |                                                   |             |                |
| 28                   | 2-LG                         | pmol/tape | 27.8                             | 11.8 [2.8 - 50.4]                                     | 11.1 [7.88 - 16.3]           | 19.9 [9.41 - 72.1]        | 8.21 [1.7 - 28.3]            | 0.1 (0.3)                                         | 0.2 (0.6)   | 0.7 (0.9)      |
|                      | AEA                          | pmol/tape | ND                               | 0.00699 [0.00551 - 0.0104]                            | 0.00267 [0.0018 - 0.00532]   | 0.0112 [0.00433 - 0.0666] | 0.00363 [0.00108 - 0.0132]   |                                                   |             |                |
|                      | DGLEA                        | pmol/tape | ND                               | 0.0257 [0.0106 - 0.0547]                              | 0.0119 [0.00386 - 0.0583]    | 0.0694 [0.00792 - 0.39]   | 0.0394 [0.0138 - 0.0952]     |                                                   |             |                |
|                      | DHEA                         | pmol/tape | 0.001                            | 0.00216 [0.000687 - 0.00532]                          | 0.00119 [0.000231 - 0.00492] | 0.0086 [0.00277 - 0.039]  | 0.00165 [0.000507 - 0.00586] |                                                   |             |                |
| 29                   | NEFA - C12:0                 | μmol/tape | 1.1                              | 0.962 [0.127 - 2.67]                                  | 2.43 [1.02 - 4.85]           | 5.14 [0.931 - 11.7]       | 2.78 [0.77 - 6.04]           | 0.9 (1)                                           | 0.04 (0.19) | 0.1 (0.6)      |
| 30                   | 15,16-EpODE                  | pmol/tape | 0.1                              | 17.2 [9.86 - 24.6]                                    | 6.62 [4.65 - 14.2]           | 12.1 [3.23 - 27.4]        | 9.03 [1.98 - 22.3]           | 0.04 (0.3)                                        | 0.4 (0.8)   | 0.5 (0.9)      |
|                      | C14 Ceramide                 | pmol/tape | 0.3                              | 3.3 [2.63 - 5.15]                                     | 2.14 [1.28 - 4.76]           | 4.08 [2.16 - 7.57]        | 2.64 [1.11 - 4.14]           |                                                   |             |                |
|                      | TFA - 9c,11t-CLA             | μmol/tape | 0.119                            | 0.801 [0.725 - 0.901]                                 | 0.292 [0.098 - 0.647]        | 0.924 [0.525 - 1.64]      | 0.411 [0.149 - 0.899]        |                                                   |             |                |
|                      | TFA - C14:1n5                | μmol/tape | 0.181                            | 3.2 [2.08 - 4.38]                                     | 1.55 [0.551 - 3.62]          | 2.22 [0.913 - 6.48]       | 2.09 [0.274 - 5.85]          |                                                   |             |                |
|                      | TFA - C17:1n7                | μmol/tape | 0                                | 48 [33.6 - 60.5]                                      | 21 [12.1 - 31.6]             | 47.2 [23 - 93.6]          | 36.9 [7.52 - 80.8]           |                                                   |             |                |
|                      | TFA - C18:1n12 <sup>f</sup>  | μmol/tape | 4.67                             | 178 [141 - 291]                                       | 86.1 [59.7 - 128]            | 171 [109 - 358]           | 122 [28.1 - 314]             |                                                   |             |                |
| TFA - C19:1n9        | μmol/tape                    | 0.299     | 3.38 [2.75 - 5.11]               | 1.69 [0.861 - 3.2]                                    | 3.43 [1.23 - 10.2]           | 1.78 [0.106 - 6.21]       |                              |                                                   |             |                |
| 31                   | TFA - C14:0                  | μmol/tape | 1.211                            | 117 [101 - 154]                                       | 61.9 [35.1 - 127]            | 95.7 [46.6 - 158]         | 83.3 [17.8 - 416]            | 0.2 (0.7)                                         | 0.6 (0.9)   | 0.3 (0.9)      |
|                      | TFA - C15:0                  | μmol/tape | 0.192                            | 75.9 [58 - 93.7]                                      | 36.5 [21 - 60.1]             | 59.7 [23.8 - 109]         | 66.8 [17.5 - 274]            |                                                   |             |                |
|                      | TFA - C16:0                  | μmol/tape | 14.935                           | 298 [261 - 362]                                       | 171 [116 - 254]              | 258 [124 - 501]           | 215 [53.8 - 712]             |                                                   |             |                |
|                      | TFA - C16:1n10 <sup>e</sup>  | μmol/tape | 0.374                            | 403 [349 - 477]                                       | 186 [97.6 - 342]             | 350 [159 - 708]           | 299 [46.5 - 1100]            |                                                   |             |                |
|                      | TFA - C17:0                  | μmol/tape | 0.432                            | 13.6 [9.98 - 17.8]                                    | 6.41 [3.44 - 9.87]           | 13.9 [6.74 - 27.6]        | 13.2 [3.43 - 34.8]           |                                                   |             |                |
|                      | TFA - Total Fatty Acids      | μmol/tape |                                  | 1340 [1180 - 1510]                                    | 678 [459 - 1030]             | 1200 [729 - 2200]         | 974 [217 - 3360]             |                                                   |             |                |
| 32                   | TFA - C19:0                  | μmol/tape | 0.098                            | 1.66 [1.33 - 1.89]                                    | 0.815 [0.401 - 1.16]         | 1.85 [0.967 - 3.32]       | 1.74 [0.419 - 3.73]          | 0.3 (0.7)                                         | 0.2 (0.5)   | 0.4 (0.9)      |
|                      | TFA - C20:0                  | μmol/tape | 0.631                            | 5.62 [4.94 - 6.28]                                    | 2.97 [1.62 - 4.12]           | 5.91 [3.54 - 9.62]        | 5.02 [1.08 - 13.7]           |                                                   |             |                |
|                      | TFA - C21:0                  | μmol/tape | 0.087                            | 0.462 [0.421 - 0.486]                                 | 0.252 [0.082 - 0.464]        | 0.521 [0.176 - 1.07]      | 0.526 [0.137 - 1.29]         |                                                   |             |                |
|                      | TFA - C22:0                  | μmol/tape | 0.521                            | 4.78 [4.19 - 5.55]                                    | 3.1 [2.19 - 4.32]            | 5.13 [2.75 - 8.52]        | 4.53 [1.08 - 12.9]           |                                                   |             |                |
|                      | TFA - C24:0                  | μmol/tape | 0.348                            | 13 [9.58 - 15.3]                                      | 7.44 [5.01 - 12.9]           | 13.8 [7.96 - 24.7]        | 11.5 [1.42 - 35.8]           |                                                   |             |                |

<sup>a</sup> Analytes were subjected to hierarchical cluster analysis using the method of Ward (1965)

<sup>b</sup> Data reported as Geometric Mean [Range]

<sup>c</sup> The reported p-values are also adjusted for multiple comparisons by the Benjamini-Hochberg procedure at q = 0.2

<sup>d</sup> This analyte represents the sum of the peaks of all observed isomers of the linoleate-derived triols. Concentrations were calculated relative to concentrations of authentic 9,12,13-TriHOME standards

<sup>e</sup> Analyte quantified using the response of the coeluting C16:1n7 standards

<sup>f</sup> Analyte quantified using the response of the coeluting C18:1n9 standards

Supplemental Table S5

**Supplemental Table S5A.** Effects of various standardizing strategies on sebum lipid mediator concentrations in individuals with atopic dermatitis ( $n = 11$  in all cases).

| Lipid Mediator                   | Coefficient of Variance (%) <sup>a</sup> |          |               |                       | $P^b$   |
|----------------------------------|------------------------------------------|----------|---------------|-----------------------|---------|
|                                  | Per-Sebutape Patch                       | Per-NEFA | Per-Total TEA | Per-Sebumeter Reading |         |
| <i>Oxylipins and Nitrolipids</i> |                                          |          |               |                       |         |
| PGE1                             | 96.1                                     | 189      | 200           | 161                   | 0.013   |
| PGE3                             | 25                                       | 111      | 99.2          | 95.5                  | 0.07    |
| Sum TriHOMEs <sup>c</sup>        | 124                                      | 74.4     | 102           | 97.7                  | < 0.001 |
| 9,10-e-DiHO                      | 30.7                                     | 68.4     | 67.5          | 103                   | < 0.001 |
| 12,13-DiHOME                     | 88.5                                     | 113      | 129           | 87                    | < 0.001 |
| 9,10-DiHOME                      | 117                                      | 119      | 158           | 84                    | < 0.001 |
| 15,16-DiHODE                     | 271                                      | 275      | 303           | 180                   | < 0.001 |
| 12,13-DiHODE                     | 154                                      | 150      | 205           | 78.7                  | < 0.001 |
| 9,10-DiHODE                      | 291                                      | 286      | 307           | 194                   | < 0.001 |
| 5,6-DiHETrE                      | 85                                       | 122      | 141           | 108                   | 0.15    |
| 8,9-DiHETrE                      | 74.1                                     | 92.7     | 94            | 76.7                  | < 0.001 |
| 17,18-DiHETE                     | 53.6                                     | 109      | 84.5          | 86.4                  | < 0.001 |
| 20-HETE                          | 55.9                                     | 116      | 79.5          | 108                   | < 0.001 |
| 15-HETE                          | 67.1                                     | 103      | 104           | 114                   | < 0.001 |
| 12-HETE                          | 111                                      | 221      | 215           | 146                   | < 0.001 |
| 11-HETE                          | 91.6                                     | 199      | 178           | 131                   | < 0.001 |
| 9-HETE                           | 80.9                                     | 162      | 156           | 100                   | 0.006   |
| 8-HETE                           | 98                                       | 224      | 213           | 136                   | < 0.001 |
| 5-HETE                           | 69.2                                     | 66.8     | 103           | 150                   | < 0.001 |
| 15-HEPE                          | 35.7                                     | 115      | 117           | 89.5                  | 0.22    |
| 12-HEPE                          | 128                                      | 231      | 235           | 174                   | < 0.001 |
| 9-HEPE                           | 71.9                                     | 146      | 151           | 121                   | 0.02    |
| 5-HEPE                           | 98.3                                     | 99.3     | 119           | 91.5                  | < 0.001 |
| 17-HDoHE                         | 59.9                                     | 154      | 166           | 94.2                  | < 0.001 |
| 14-HDoHE                         | 116                                      | 236      | 228           | 164                   | < 0.001 |
| 9,10-EpO                         | 20.7                                     | 84.7     | 87.9          | 96.7                  | < 0.001 |
| 12,13-EpODE                      | 128                                      | 123      | 167           | 140                   | < 0.001 |
| 9,10-EpOME                       | 118                                      | 114      | 142           | 156                   | < 0.001 |
| 12,13-Ep-9-KODE                  | 25.7                                     | 76.9     | 66.5          | 90.2                  | < 0.001 |
| 15,16-EpODE                      | 69.6                                     | 54       | 44.4          | 117                   | < 0.001 |
| 11,12-EpETrE                     | 97.2                                     | 110      | 133           | 174                   | 0.004   |
| 8,9-EpETrE                       | 105                                      | 77       | 105           | 63.8                  | < 0.001 |
| 13-KODE                          | 72.5                                     | 92.2     | 93.7          | 56.7                  | < 0.001 |
| 15-KETE                          | 51.1                                     | 46.6     | 53.4          | 103                   | < 0.001 |
| 5-KETE                           | 69.7                                     | 94.4     | 116           | 125                   | 0.008   |
| 10-Nitrolinoleate                | 88.5                                     | 111      | 117           | 156                   | < 0.001 |

<sup>a</sup> Coefficient of Variance calculated as the ratio of the standard deviation of all subject's lipid mediator concentrations when standardized using the appropriate denominator to the mean of the same values

<sup>b</sup> The reported p-values are adjusted for multiple comparisons by the Benjamini-Hochberg procedure at  $q = 0.2$

<sup>c</sup> This analyte represents the sum of the peaks of all observed isomers of the linoleate-derived triols. Concentrations were calculated relative to concentrations of authentic 9,12,13-TriHOME standards

Supplemental Table S5

**Supplemental Table S5A.** Effects of various standardizing strategies on sebum lipid mediator concentrations in individuals with atopic dermatitis ( $n = 11$  in all cases).

| Lipid Mediator          | Coefficient of Variance (%) <sup>a</sup> |          |               |                       |         |
|-------------------------|------------------------------------------|----------|---------------|-----------------------|---------|
|                         | Per-Sebutape Patch                       | Per-NEFA | Per-Total TEA | Per-Sebumeter Reading | $P^b$   |
| <b>Endocannabinoids</b> |                                          |          |               |                       |         |
| 1-OG                    | 79.6                                     | 91.3     | 97.4          | 74.4                  | < 0.001 |
| 2-OG                    | 54.1                                     | 67.2     | 73.6          | 79.4                  | 0.8     |
| 1-LG                    | 62.3                                     | 139      | 95.9          | 139                   | 0.051   |
| 2-LG                    | 104                                      | 203      | 208           | 163                   | 0.053   |
| 1-AG                    | 86.7                                     | 206      | 130           | 144                   | < 0.001 |
| 2-AG                    | 86.2                                     | 95.9     | 79.2          | 133                   | < 0.001 |
| PEA                     | 101                                      | 146      | 93.8          | 112                   | < 0.001 |
| SEA                     | 59.8                                     | 103      | 88.7          | 107                   | < 0.001 |
| OEA                     | 173                                      | 216      | 168           | 184                   | < 0.001 |
| LEA                     | 144                                      | 172      | 127           | 155                   | < 0.001 |
| AEA                     | 86.8                                     | 141      | 138           | 108                   | 0.046   |
| DGLEA                   | 82.3                                     | 114      | 115           | 139                   | < 0.001 |
| DHEA                    | 87.6                                     | 95.7     | 80.5          | 169                   | 0.012   |
| <b>Sphingolipids</b>    |                                          |          |               |                       |         |
| 18:1 Sphingosine        | 29.6                                     | 103      | 82            | 89.2                  | < 0.001 |
| C14 Ceramide            | 46                                       | 55.4     | 50.2          | 129                   | < 0.001 |
| C16 Ceramide            | 63.9                                     | 147      | 157           | 84                    | < 0.001 |
| C18 Ceramide            | 68.7                                     | 154      | 155           | 139                   | < 0.001 |
| C18:1 Ceramide          | 25                                       | 82.2     | 55.2          | 106                   | < 0.001 |
| C20 Ceramide            | 58.6                                     | 115      | 84.4          | 138                   | < 0.001 |
| C24 Ceramide            | 59.5                                     | 130      | 141           | 107                   | < 0.001 |
| C18 dihydroceramide     | 28.4                                     | 82.5     | 52.2          | 94.3                  | < 0.001 |
| C24 dihydroceramide     | 59.9                                     | 113      | 78.3          | 111                   | < 0.001 |

<sup>a</sup> Coefficient of Variance calculated as the ratio of the standard deviation of all subject's lipid mediator concentrations when standardized using the appropriate denominator to the mean of the same values

<sup>b</sup> The reported p-values are adjusted for multiple comparisons by the Benjamini-Hochberg procedure at  $q = 0.2$

<sup>c</sup> This analyte represents the sum of the peaks of all observed isomers of the linoleate-derived triols. Concentrations were calculated relative to concentrations of authentic 9,12,13-TriHOME standards

Supplemental Table S5

**Supplemental Table S5B.** Effects of various standardizing strategies on sebum lipid mediator concentrations in individuals without atopic dermatitis ( $n = 9$  in all cases).

| Lipid Mediator                   | Coefficient of Variance (%) <sup>a</sup> |          |               |                       | $P^b$   |
|----------------------------------|------------------------------------------|----------|---------------|-----------------------|---------|
|                                  | Per-Sebutape Patch                       | Per-NEFA | Per-Total TEA | Per-Sebumeter Reading |         |
| <i>Oxylipins and Nitrolipids</i> |                                          |          |               |                       |         |
| PGE1                             | 263                                      | 265      | 278           | 294                   | 0.002   |
| PGE3                             | 42.5                                     | 96.4     | 34.5          | 113                   | 0.002   |
| Sum TriHOMEs <sup>c</sup>        | 130                                      | 171      | 102           | 91.7                  | < 0.001 |
| 9,10-e-DiHO                      | 35.9                                     | 73.4     | 39.2          | 135                   | < 0.001 |
| 12,13-DiHOME                     | 132                                      | 86.2     | 88.7          | 59.5                  | < 0.001 |
| 9,10-DiHOME                      | 37.3                                     | 71.9     | 30.7          | 73.7                  | < 0.001 |
| 15,16-DiHODE                     | 63.5                                     | 73.1     | 48.7          | 100                   | < 0.001 |
| 12,13-DiHODE                     | 56.7                                     | 79.4     | 30.4          | 73.8                  | < 0.001 |
| 9,10-DiHODE                      | 37.7                                     | 82.4     | 41.7          | 115                   | 0.007   |
| 5,6-DiHETrE                      | 101                                      | 88       | 100           | 195                   | 0.02    |
| 8,9-DiHETrE                      | 75.6                                     | 80.9     | 73.3          | 171                   | < 0.001 |
| 17,18-DiHETE                     | 57.3                                     | 57.7     | 64.3          | 141                   | < 0.001 |
| 20-HETE                          | 55.2                                     | 83.2     | 64.5          | 149                   | < 0.001 |
| 15-HETE                          | 134                                      | 52.2     | 95.6          | 170                   | < 0.001 |
| 12-HETE                          | 163                                      | 81       | 122           | 196                   | < 0.001 |
| 11-HETE                          | 133                                      | 76.4     | 109           | 206                   | < 0.001 |
| 9-HETE                           | 61.9                                     | 60.6     | 77.2          | 181                   | < 0.001 |
| 8-HETE                           | 191                                      | 114      | 152           | 217                   | < 0.001 |
| 5-HETE                           | 105                                      | 99.6     | 93.2          | 195                   | < 0.001 |
| 15-HEPE                          | 118                                      | 79.7     | 100           | 199                   | < 0.001 |
| 12-HEPE                          | 89.7                                     | 77.1     | 73.4          | 156                   | < 0.001 |
| 9-HEPE                           | 57.4                                     | 118      | 61.9          | 165                   | 0.012   |
| 5-HEPE                           | 80.3                                     | 125      | 52.2          | 48.9                  | < 0.001 |
| 17-HDoHE                         | 122                                      | 125      | 128           | 222                   | 0.02    |
| 14-HDoHE                         | 129                                      | 51.7     | 84            | 152                   | < 0.001 |
| 9,10-EpO                         | 115                                      | 142      | 117           | 148                   | < 0.001 |
| 12,13-EpODE                      | 107                                      | 133      | 75            | 110                   | 0.011   |
| 9,10-EpOME                       | 95.1                                     | 158      | 69.6          | 134                   | 0.9     |
| 12,13-Ep-9-KODE                  | 31.3                                     | 80.2     | 42.1          | 76.4                  | < 0.001 |
| 15,16-EpODE                      | 54.1                                     | 75.1     | 53.5          | 53.9                  | < 0.001 |
| 11,12-EpETrE                     | 74.7                                     | 124      | 69            | 145                   | 0.001   |
| 8,9-EpETrE                       | 210                                      | 98.1     | 163           | 126                   | < 0.001 |
| 13-KODE                          | 105                                      | 131      | 79.3          | 143                   | < 0.001 |
| 15-KETE                          | 107                                      | 54.4     | 71.2          | 134                   | < 0.001 |
| 5-KETE                           | 48.5                                     | 83       | 54.8          | 104                   | 0.013   |
| 10-Nitrolinoleate                | 50.1                                     | 82.7     | 72.9          | 128                   | < 0.001 |

<sup>a</sup> Coefficient of Variance calculated as the ratio of the standard deviation of all subject's lipid mediator concentrations when standardized using the appropriate denominator to the mean of the same values

<sup>b</sup> The reported p-values are adjusted for multiple comparisons by the Benjamini-Hochberg procedure at  $q = 0.2$

<sup>c</sup> This analyte represents the sum of the peaks of all observed isomers of the linoleate-derived triols. Concentrations were calculated relative to concentrations of authentic 9,12,13-TriHOME standards



Supplemental Table S5

**Supplemental Table S5B.** Effects of various standardizing strategies on sebum lipid mediator concentrations in individuals without atopic dermatitis (*n* = 9 in all cases).

| Lipid Mediator          | Coefficient of Variance (%) <sup>a</sup> |          |               |                       | <i>p</i> <sup>b</sup> |
|-------------------------|------------------------------------------|----------|---------------|-----------------------|-----------------------|
|                         | Per-Sebutape Patch                       | Per-NEFA | Per-Total TEA | Per-Sebumeter Reading |                       |
| <b>Endocannabinoids</b> |                                          |          |               |                       |                       |
| 1-OG                    | 92.1                                     | 31.5     | 60.1          | 93.7                  | < 0.001               |
| 2-OG                    | 94                                       | 64.9     | 67.1          | 95.3                  | < 0.001               |
| 1-LG                    | 68.8                                     | 63.9     | 54            | 112                   | < 0.001               |
| 2-LG                    | 96.9                                     | 149      | 64.6          | 88.2                  | < 0.001               |
| 1-AG                    | 123                                      | 56.8     | 89.9          | 174                   | < 0.001               |
| 2-AG                    | 178                                      | 181      | 166           | 139                   | 0.011                 |
| PEA                     | 73.1                                     | 49.4     | 69.6          | 175                   | < 0.001               |
| SEA                     | 45.1                                     | 81.6     | 47.9          | 129                   | < 0.001               |
| OEA                     | 120                                      | 132      | 136           | 233                   | < 0.001               |
| LEA                     | 76.3                                     | 113      | 102           | 211                   | < 0.001               |
| AEA                     | 142                                      | 47.8     | 90.1          | 115                   | < 0.001               |
| DGLEA                   | 133                                      | 54.1     | 98.2          | 80.9                  | < 0.001               |
| DHEA                    | 178                                      | 176      | 165           | 113                   | 0.02                  |
| <b>Sphingolipids</b>    |                                          |          |               |                       |                       |
| 18:1 Sphingosine        | 16.8                                     | 62.9     | 44            | 143                   | < 0.001               |
| C14 Ceramide            | 46.8                                     | 52.3     | 30            | 83.8                  | < 0.001               |
| C16 Ceramide            | 33.1                                     | 56.7     | 55.3          | 168                   | < 0.001               |
| C18 Ceramide            | 50                                       | 90.9     | 63.7          | 100                   | < 0.001               |
| C18:1 Ceramide          | 30.2                                     | 77.7     | 39.6          | 98.3                  | < 0.001               |
| C20 Ceramide            | 74.7                                     | 138      | 66.3          | 125                   | < 0.001               |
| C24 Ceramide            | 59.2                                     | 93.8     | 78.9          | 90.5                  | < 0.001               |
| C18 dihydroceramide     | 37.3                                     | 80       | 46.2          | 84.5                  | < 0.001               |
| C24 dihydroceramide     | 68.1                                     | 100      | 77.2          | 83.7                  | < 0.001               |

<sup>a</sup> Coefficient of Variance calculated as the ratio of the standard deviation of all subject's lipid mediator concentrations when standardized using the appropriate denominator to the mean of the same values

<sup>b</sup> The reported *p*-values are adjusted for multiple comparisons by the Benjamini-Hochberg procedure at *q* = 0.2

<sup>c</sup> This analyte represents the sum of the peaks of all observed isomers of the linoleate-derived triols. Concentrations were calculated relative to concentrations of authentic 9,12,13-TriHOME standards

Supplemental Table S6

**Supplemental Table S6.** Lipid mediator concentrations in analytes detected in both sweat and sebum collected from the same subjects (n = 19). Analyte concentrations are reported per representative sample of each matrix. Sweat concentrations were obtained from data previously published in Journal of Lipid Research. Agrawal, K., L.A. Hassoun, N. Foolad, T.L. Pedersen, R.K. Sivamani, and J.W. Newman. Sweat lipid mediator profiling: a noninvasive approach for cutaneous research. Journal of Lipid Research. 2017; 58:188-195. © the American Society for Biochemistry and Molecular Biology.

| Lipid Mediator                   | Concentration (pmol/sample) <sup>a</sup> |                  | P <sup>b</sup> | Fold Difference <sup>c</sup> | Spearman's ρ (P) |
|----------------------------------|------------------------------------------|------------------|----------------|------------------------------|------------------|
|                                  | Sweat                                    | Sebum            |                |                              |                  |
| <i>Oxylipins and Nitrolipids</i> |                                          |                  |                |                              |                  |
| 5-HETE                           | 0.00551 ± 0.00565                        | 0.155 ± 0.199    | 4.60E-09       | 23.5 [3.4 - 214]             | 0.25 (0.3)       |
| 8-HETE                           | 0.00711 ± 0.00704                        | 0.088 ± 0.14     | 0.87           | 6.9 [0.4 - 87]               | 0.42 (0.08)      |
| 11-HETE                          | 0.00602 ± 0.00472                        | 0.0555 ± 0.0658  | 1.00E-05       | 6.2 [0.2 - 62]               | 0.45 (0.05)      |
| 12-HETE                          | 0.0232 ± 0.0338                          | 0.951 ± 1.23     | 2.40E-08       | 45.7 [3 - 1582]              | 0.25 (0.3)       |
| 15-HETE                          | 0.0166 ± 0.0243                          | 1.09 ± 1.42      | 4.10E-11       | 65.3 [8.2 - 588]             | 0.41 (0.09)      |
| 9-HEPE                           | 0.00184 ± 0.00123                        | 0.0119 ± 0.0083  | 5.10E-05       | 5.9 [0.1 - 79]               | 0.11 (0.7)       |
| 12-HEPE                          | 0.00395 ± 0.00256                        | 0.0284 ± 0.0286  | 2.00E-04       | 5.3 [0.2 - 55]               | -0.02 (0.9)      |
| 9,10-e-DiHO                      | 25.2 ± 82.9                              | 3.42 ± 1.17      | 0.7            | 0.9 [0.01 - 7.4]             | -0.01 (1)        |
| 9,10-DiHOME                      | 0.166 ± 0.203                            | 1.88 ± 0.529     | 4.10E-11       | 16.4 [1.9 - 62]              | 0.39 (0.1)       |
| 12,13-DiHOME                     | 0.246 ± 1.04                             | 1.38 ± 1.53      | 8.70E-05       | 261.9 [0.2 - 2560]           | -0.04 (0.9)      |
| 9,10-DiHODE                      | 0.00591 ± 0.00465                        | 0.0701 ± 0.0299  | 4.60E-09       | 15.2 [3.7 - 111]             | -0.05 (0.8)      |
| 15,16-DiHODE                     | 0.029 ± 0.0447                           | 0.291 ± 0.334    | 8.00E-08       | 12.9 [1.6 - 185]             | 0.19 (0.4)       |
| 5,6-DiHETrE                      | 0.154 ± 0.11                             | 0.00914 ± 0.026  | 2.10E-03       | 0.04 [0.003 - 2.2]           | 0.18 (0.5)       |
| 8,9-DiHETrE                      | 0.0339 ± 0.022                           | 4.37 ± 3.21      | 4.90E-14       | 119.4 [34 - 574]             | 0.28 (0.2)       |
| 17,18-DiHETE                     | 0.0418 ± 0.0393                          | 0.341 ± 0.21     | 9.90E-06       | 9.9 [0.3 - 81]               | -0.26 (0.3)      |
| 9,10-EpOME                       | 0.0783 ± 0.126                           | 4.72 ± 5.87      | 0.15           | 70.8 [0.5 - 2001]            | -0.11 (0.6)      |
| 11,12-EpETrE                     | 0.00102 ± 0.00112                        | 0.0155 ± 0.0134  | 7.60E-06       | 18.9 [1.1 - 3885]            | -0.04 (0.9)      |
| 13-KODE                          | 0.157 ± 0.304                            | 12.1 ± 12.3      | 2.00E-09       | 113.5 [1.4 - 4273]           | 0.23 (0.3)       |
| 12,13-Ep-9-KODE                  | 0.103 ± 0.154                            | 5.47 ± 1.57      | 1.40E-12       | 101 [11 - 567]               | 0.29 (0.2)       |
| 5-KETE                           | 0.00199 ± 0.00139                        | 0.0124 ± 0.00804 | 1.90E-05       | 7.3 [0.6 - 153]              | -0.01 (1)        |
| 10-Nitrolinoleate                | 0.00893 ± 0.0133                         | 0.19 ± 0.136     | 2.40E-08       | 29.2 [1.2 - 357]             | 0.21 (0.4)       |
| PGE1                             | 0.0167 ± 0.0139                          | 0.024 ± 0.0881   | 0.15           | 0.5 [0.03 - 17]              | 0.34 (0.2)       |
| Sum TriHOMEs <sup>d</sup>        | 1.66 ± 1.85                              | 1.87 ± 2.54      | 0.72           | 0.9 [0.1 - 4.8]              | 0.41 (0.09)      |

<sup>a</sup> Values are reported as Mean ± SD.

<sup>b</sup> P values are adjusted for multiple comparisons using the Benjamini-Hochberg procedure (q = 0.2).

<sup>c</sup> Ratio of each individual's sebum lipid mediator concentrations to that individual's sweat lipid mediator concentrations. Data are presented as geometric mean [range].

<sup>d</sup> This analyte represents the sum of the peaks of all observed isomers of the linoleate-derived triols. Concentrations were calculated relative to concentrations of authentic 9,12,13-TriHOME standards

Supplemental Table S6

**Supplemental Table S6.** Lipid mediator concentrations in analytes detected in both sweat and sebum collected from the same subjects (n = 19). Analyte concentrations are reported per representative sample of each matrix. Sweat concentrations were obtained from data previously published in Journal of Lipid Research. Agrawal, K., L.A. Hassoun, N. Foolad, T.L. Pedersen, R.K. Sivamani, and J.W. Newman. Sweat lipid mediator profiling: a noninvasive approach for cutaneous research. Journal of Lipid Research. 2017; 58:188-195. © the American Society for Biochemistry and Molecular Biology.

| Lipid Mediator          | Concentration (pmol/sample) <sup>a</sup> |                 | P <sup>b</sup> | Fold Difference <sup>c</sup> | Spearman's p (P) |
|-------------------------|------------------------------------------|-----------------|----------------|------------------------------|------------------|
|                         | Sweat                                    | Sebum           |                |                              |                  |
| <b>Endocannabinoids</b> |                                          |                 |                |                              |                  |
| PEA                     | 0.203 ± 0.499                            | 104 ± 88.3      | 2.70E-13       | 1008.8 [74 - 6195]           | 0.38 (0.1)       |
| OEA                     | 0.0234 ± 0.0501                          | 25.4 ± 35.1     | 3.30E-13       | 1234.4 [25 - 15169]          | 0.57 (0.01)      |
| SEA                     | 0.219 ± 0.533                            | 63.5 ± 35.1     | 2.70E-13       | 745.4 [41 - 6605]            | 0.18 (0.5)       |
| LEA                     | 0.0025 ± 0.00196                         | 5.31 ± 8.2      | 0.16           | 1273.9 [147 - 18128]         | 0.06 (0.8)       |
| AEA                     | 0.00106 ± 0.000648                       | 0.0177 ± 0.0287 | 2.30E-08       | 12.5 [3.6 - 419]             | 0.34 (0.2)       |
| 2-OG                    | 53.2 ± 208                               | 416 ± 388       | 6.60E-08       | 276.5 [0.3 - 21794]          | 0.38 (0.1)       |
| 1-OG                    | 412 ± 1590                               | 777 ± 873       | 1.80E-05       | 45 [0.1 - 3041]              | 0.24 (0.3)       |
| 2-LG                    | 6.58 ± 22.5                              | 24 ± 33.3       | 0.83           | 31.1 [0.03 - 4553]           | 0.49 (0.03)      |
| 1-LG                    | 72.6 ± 253                               | 300 ± 230       | 0.06           | 69.2 [0.2 - 3053]            | 0.34 (0.2)       |
| 2-AG                    | 1.88 ± 6.66                              | 3.75 ± 4.87     | 2.00E-04       | 11.6 [0.1 - 708]             | -0.03 (0.9)      |
| 1-AG                    | 13.2 ± 48.9                              | 1.17 ± 3.24     | 0.41           | 1.1 [0.01 - 136]             | 0.37 (0.1)       |
| <b>Sphingolipids</b>    |                                          |                 |                |                              |                  |
| 18:1 Sphingosine        | 0.457 ± 0.422                            | 31 ± 7.37       | 6.60E-12       | 101.9 [15 - 3056]            | -0.06 (0.8)      |
| C14 Ceramide            | 0.0321 ± 0.0333                          | 6.81 ± 3.32     | 5.40E-13       | 343.4 [46 - 17633]           | 0.41 (0.08)      |
| C16 Ceramide            | 0.221 ± 0.155                            | 27.8 ± 13.8     | 2.70E-13       | 148.8 [33 - 1290]            | 0.23 (0.4)       |
| C18 Ceramide            | 0.0446 ± 0.0349                          | 1.07 ± 0.693    | 1.60E-07       | 22.9 [0.3 - 727]             | -0.14 (0.6)      |
| C20 Ceramide            | 0.0651 ± 0.0496                          | 4.25 ± 3.5      | 5.00E-11       | 69.5 [9.7 - 1549]            | -0.17 (0.5)      |
| C24 Ceramide            | 0.163 ± 0.137                            | 10.5 ± 6.11     | 5.00E-11       | 70.7 [5.6 - 1570]            | -0.33 (0.2)      |
| C18 dihydroceramide     | 0.0333 ± 0.057                           | 3.98 ± 1.55     | 2.70E-13       | 203.8 [14 - 1502]            | 0.06 (0.8)       |
| C24 dihydroceramide     | 0.131 ± 0.126                            | 7.96 ± 5.12     | 3.10E-11       | 69.3 [5.5 - 641]             | -0.1 (0.7)       |

<sup>a</sup> Values are reported as Mean ± SD.

<sup>b</sup> P values are adjusted for multiple comparisons using the Benjamini-Hochberg procedure (q = 0.2).

<sup>c</sup> Ratio of each individual's sebum lipid mediator concentrations to that individual's sweat lipid mediator concentrations. Data are presented as geometric mean [range].

<sup>d</sup> This analyte represents the sum of the peaks of all observed isomers of the linoleate-derived triols. Concentrations were calculated relative to concentrations of authentic 9,12,13-TriHOME standards.
